1 **FBXL19 recruits CDK-Mediator to the CpG islands of developmental genes to prime**  
2 **them for activation during lineage commitment**

3

4 Emilia Dimitrova<sup>1</sup>, Takashi Kondo<sup>2\*</sup>, Angelika Feldmann<sup>1\*</sup>, Manabu Nakayama<sup>4</sup>, Yoko  
5 Koseki<sup>2</sup>, Rebecca Konietzny<sup>5,6</sup>, Benedikt M Kessler<sup>5</sup>, Haruhiko Koseki<sup>2,3</sup>, and Robert J Klose<sup>1†</sup>

6

7 1. Department of Biochemistry, University of Oxford, Oxford, OX1 3QU, United Kingdom

8 2. Laboratory for Developmental Genetics, RIKEN Center for Integrative Medical Sciences,  
9 1-7-29 Suehiro-cho, Tsurumi-ku, Yokohama, Kanagawa 230-0045, Japan

10 3. CREST, Japan Science and Technology Agency

11 4. Department of Technology Development, Kazusa DNA Research Institute, 2-6-7 Kazusa-  
12 Kamatari, Kisarazu, Chiba 292-0818, Japan

13 5. TDI Mass Spectrometry Laboratory, Target Discovery Institute, Nuffield Department of  
14 Medicine, University of Oxford, Oxford, United Kingdom

15 6. Present address: Agilent Technologies, Hewlett-Packard-Str. 8 - 76337 Waldbronn,  
16 Germany

17

18

19 \*these authors contributed equally to this work

20 † Corresponding author: [rob.klose@bioch.ox.ac.uk](mailto:rob.klose@bioch.ox.ac.uk)

21

22

23 **Abstract**

24 CpG islands are gene regulatory elements associated with the majority of mammalian  
25 promoters, yet how they regulate gene expression remains poorly understood. Here, we identify  
26 FBXL19 as a CpG island-binding protein in mouse embryonic stem (ES) cells and show that  
27 it associates with the CDK-Mediator complex. We discover that FBXL19 recruits CDK-  
28 Mediator to CpG island-associated promoters of non-transcribed developmental genes to prime  
29 these genes for activation during cell lineage commitment. We further show that recognition  
30 of CpG islands by FBXL19 is essential for mouse development. Together this reveals a new  
31 CpG island-centric mechanism for CDK-Mediator recruitment to developmental gene  
32 promoters in ES cells and a requirement for CDK-Mediator in priming these developmental  
33 genes for activation during cell lineage commitment.

34

35

36

37

38

39

40

41

42

43

44

## 45 **Introduction**

46 Multicellular development relies on the formation of cell type-specific gene expression  
47 programmes that support differentiation. At the most basic level, these expression programmes  
48 are defined by cell signalling pathways that control how transcription factors bind DNA  
49 sequences in gene regulatory elements and shape RNA polymerase II (RNAPolII)-based  
50 transcription from the core gene promoter (reviewed in (Spitz and Furlong, 2012)). In  
51 eukaryotes, the activity of RNAPolII is also regulated by a large multi-subunit complex,  
52 Mediator, which can directly interact with transcription factors at gene regulatory elements and  
53 with RNAPolII at the gene promoter to modulate transcription activation. The Mediator  
54 complex functions through regulating pre-initiation complex formation and controlling how  
55 RNAPolII initiates, pauses, and elongates. Therefore, Mediator is central to achieving  
56 appropriate transcription from gene promoters (reviewed in (Allen and Taatjes, 2015; Malik  
57 and Roeder, 2010)).

58 In mammalian genomes, CpG dinucleotides are pervasively methylated and this epigenetically  
59 maintained DNA modification is generally associated with transcriptional inhibition, playing a  
60 central role in silencing of repetitive and parasitic DNA elements (Klose and Bird, 2006;  
61 Schubeler, 2015). Most gene promoters, however, are embedded in short elements with  
62 elevated CpG dinucleotide content, called CpG islands, which remain free of DNA methylation  
63 (Bird et al., 1985; Illingworth and Bird, 2009; Larsen et al., 1992). Interestingly, mammalian  
64 cells have evolved a DNA binding domain, called a ZF-CxxC domain, which can recognize  
65 CpG dinucleotides when they are non-methylated (Lee et al., 2001; Voo et al., 2000). This  
66 endows ZF-CxxC domain-containing proteins with the capacity to recognize and bind CpG  
67 islands throughout the genome (Blackledge et al., 2010; Thomson et al., 2010). There are  
68 twelve mammalian proteins encoding a ZF-CxxC domain, most of which are found in large  
69 chromatin modifying complexes that post-translationally modify histone proteins to regulate

70 gene expression from CpG islands (Long et al., 2013a). This has led to the proposal that CpG  
71 islands may function through chromatin modification to affect transcription (Blackledge et al.,  
72 2013).

73 One of the first characterised ZF-CxxC domain-containing proteins was lysine specific  
74 demethylase 2A (KDM2A) (Blackledge et al., 2010). KDM2A is a JmjC-domain-containing  
75 histone lysine demethylase that removes histone H3 lysine 36 mono- and di- methylation  
76 (H3K36me1/2) from CpG islands (Blackledge et al., 2010; Tsukada et al., 2006). Like DNA  
77 methylation, H3K36me1/me2 is found throughout the genome and is thought to be repressive  
78 to gene transcription (Carrozza et al., 2005; Keogh et al., 2005; Peters et al., 2003). Therefore,  
79 it was proposed that KDM2A counteracts H3K36me2-dependent transcriptional inhibition at  
80 CpG island-associated gene promoters (Blackledge et al., 2010). Sequence-based homology  
81 searches revealed that KDM2A has two paralogues in vertebrates, KDM2B and FBXL19  
82 (Kato and Kato, 2004). KDM2B, like KDM2A, binds to CpG islands and can function as a  
83 histone demethylase for H3K36me1/2 via its JmjC domain (Farcas et al., 2012; He et al., 2008).  
84 However, unlike KDM2A, it physically associates with the polycomb repressive complex 1  
85 (PRC1) to control how transcriptionally repressive polycomb chromatin domains form at a  
86 subset of CpG island-associated genes (Blackledge et al., 2014; Farcas et al., 2012; He et al.,  
87 2013; Wu et al., 2013). These observations have suggested that, despite extensive similarity  
88 between KDM2A and KDM2B and some functional redundancy in histone demethylation,  
89 individual KDM2 paralogues have evolved unique functions. FBXL19 remains the least well  
90 characterized and most divergent of the KDM2 paralogues. Unlike KDM2A and KDM2B, it  
91 lacks a JmjC domain and, therefore, does not have demethylase activity (Long et al., 2013a).  
92 Previous work on FBXL19 has suggested that it plays a role in a variety of cytoplasmic  
93 processes that affect cell proliferation, migration, apoptosis, TGF $\beta$  signalling, and regulation  
94 of the innate immune response (Dong et al., 2014; Wei et al., 2013; Zhao et al., 2013; Zhao et

95 al., 2012). More recently, it has also been proposed to have a nuclear function as a CpG island-  
96 binding protein (Lee et al., 2017), but its role in the nucleus still remains poorly defined.

97 Here we investigate the function of FBXL19 in mouse embryonic stem (ES) cells and show  
98 that it is predominantly found in the nucleus where it localizes in a ZF-CxxC-dependent manner  
99 to CpG island promoters. Biochemical purification of FBXL19 revealed an association with  
100 the CDK-containing Mediator complex and we discover that FBXL19 can target CDK-  
101 Mediator to chromatin. Conditional removal of the CpG island-binding domain of FBXL19 in  
102 ES cells leads to a reduction in the occupancy of CDK8 at CpG islands associated with inactive  
103 developmental genes. FBXL19 and CDK-Mediator appear to play an important role in priming  
104 genes for future expression, as these genes are not appropriately activated during ES cell  
105 differentiation when the CpG island-binding capacity of FBXL19 is abolished or CDK-  
106 Mediator is disrupted. Consistent with an important role for FBXL19 in supporting normal  
107 developmental gene expression, removal of the ZF-CxxC domain of FBXL19 leads to  
108 perturbed development and embryonic lethality in mice. Together, our findings uncover an  
109 interesting new mechanism by which CDK-Mediator is recruited to gene promoters in ES cells  
110 and demonstrate a requirement for FBXL19 and CDK-Mediator in priming developmental  
111 gene expression during cell lineage commitment.

112

## 113 **Results**

### 114 **FBXL19 is enriched in the nucleus and binds CpG islands via its ZF-CxxC domain.**

115 FBXL19 shares extensive sequence similarity and domain architecture with the other KDM2  
116 paralogues which are predominantly nuclear proteins (Figure 1A, (Blackledge et al., 2010;  
117 Farcas et al., 2012)), yet the function of FBXL19 has largely been described in the context of  
118 cytoplasmic processes (Dong et al., 2014; Wei et al., 2013; Zhao et al., 2013; Zhao et al., 2012).

119 Therefore, we first examined the subcellular distribution of FBXL19 to understand whether it  
120 was unique amongst KDM2 paralogues in localizing to the cytoplasm. To achieve this, we  
121 generated a mouse ES cell line expressing epitope-tagged FBXL19 (FS2-FBXL19) and carried  
122 out immuno-fluorescent staining. This revealed that FBXL19 was almost exclusively nuclear  
123 (Figure 1B). When we carried out subcellular biochemical fractionation, FBXL19 was also  
124 enriched in the nuclear fractions in agreement with the immuno-fluorescent staining (Figure  
125 1C). Importantly, FBXL19 was found not only in the soluble nuclear extract but also in the  
126 insoluble nuclear pellet, which contains chromatin-bound factors (Figure 1C). This suggested  
127 that FBXL19 may associate with chromatin, like other ZF-CxxC domain-containing proteins.  
128 Based on the nuclear localization of FBXL19 and the fact that it encodes a highly conserved  
129 ZF-CxxC domain (Figure S1A), we set out to determine whether FBXL19 is a CpG island-  
130 binding protein. To achieve this, we carried out chromatin immunoprecipitation followed by  
131 massively parallel sequencing (ChIP-seq) for epitope-tagged FBXL19 and compared its  
132 binding profile with those we have previously generated for KDM2A and KDM2B in mouse  
133 ES cells (Blackledge et al., 2014; Farcas et al., 2012). A visual examination of FBXL19 ChIP-  
134 seq signal revealed that it was highly enriched at both computationally predicted CpG islands  
135 and genomic regions that contain BioCAP signal, an experimental measure of non-methylated  
136 DNA (Blackledge et al., 2012) (Figure 1D). We then identified all non-methylated CpG islands  
137 (NMIs) using BioCAP data (n=27698) (Long et al., 2013b) and extended our analysis across  
138 the genome. We observed that FBXL19 ChIP-seq signal at NMIs was highly similar to that of  
139 KDM2A and KDM2B (Figure 1E). Furthermore, FBXL19 ChIP-seq signal correlated well  
140 with the density of non-methylated CpG dinucleotides in NMIs, similarly to KDM2A and  
141 KDM2B, (Figure 1F, Figure S1B, and Figure S1C), and almost all FBXL19-occupied sites fell  
142 within NMIs (Figure S1D). Together these findings demonstrate that FBXL19 is a nuclear

143 protein that binds to CpG islands, an observation supported by a recent independent study (Lee  
144 et al., 2017).

145 KDM2A and KDM2B rely on defined residues in their ZF-CxxC domain to recognize non-  
146 methylated cytosine and bind CpG islands (Blackledge et al., 2010; Farcas et al., 2012). To  
147 determine whether the association of FBXL19 with CpG islands is dependent on this domain,  
148 we generated ES cell lines expressing either a mutant version of FBXL19, in which a key lysine  
149 residue was substituted to alanine (K49A, Figure S1A) to disrupt the recognition of non-  
150 methylated CpGs, or a truncated version of FBXL19, where the ZF-CxxC domain was deleted  
151 ( $\Delta$ CXXC) (Figure 1G). Importantly, the expression levels of wild type (WT) and mutant  
152 FBXL19 transgenes were highly similar (Figure S1E). We then carried out ChIP-seq for  
153 epitope-tagged FBXL19 in these cell lines and compared the binding profiles of the mutant  
154 FBXL19 to that of WT FBXL19 (Figure 1H). This revealed a near complete loss of FBXL19  
155 binding to chromatin when the ZF-CxxC domain was deleted and a slightly less dramatic effect  
156 in the K49A mutant (Figure 1H, 1I, S1F, and S1G). Together, these observations demonstrate  
157 that binding of FBXL19 to CpG islands relies on an intact and functional ZF-CxxC domain.

158

### 159 **FBXL19 interacts with the CDK-Mediator complex in ES cells.**

160 Our ChIP-seq analyses demonstrated that FBXL19 is targeted to CpG islands in a manner that  
161 is highly similar to KDM2A and KDM2B (Figure 1). Although KDM2A and KDM2B localise  
162 to the same genomic regions and show a high degree of sequence conservation, they associate  
163 with different proteins (Farcas et al., 2012). This raised the interesting possibility that FBXL19  
164 might also have unique interaction partners. To investigate this, we affinity-purified epitope-  
165 tagged FBXL19 from ES cell nuclear extract and identified associated proteins by mass  
166 spectrometry (AP-MS, Figure 2A and S2A). This revealed that FBXL19 interacts with SKP1,

167 a known F-box-binding protein that also associates with KDM2A and KDM2B (Bai et al.,  
168 1996; Farcas et al., 2012), and the nuclear proteasome activator PSME3 (Wojcik et al., 1998).  
169 Interestingly, we also identified multiple subunits of the Mediator complex that appeared to  
170 interact with FBXL19 in a sub-stoichiometric manner (Figure 2A and B). Biochemical  
171 purifications of Mediator have identified two distinct assemblies (Liu et al., 2001; Mittler et  
172 al., 2001; Taatjes et al., 2002). The first is characterized by the presence of the MED26 subunit  
173 which associates with the middle region of Mediator and this form of the complex interacts  
174 with RNAPolIII (Naar et al., 2002; Paoletti et al., 2006; Sato et al., 2004; Takahashi et al., 2011).  
175 Alternatively, a kinase module, composed of CDK8/CDK19, MED12/12L, MED13/13L, and  
176 CCNC, can bind to Mediator in a manner which is mutually exclusive with MED26 (Taatjes et  
177 al., 2002). Interestingly, our FBXL19 purification exclusively yielded an interaction with the  
178 kinase-containing Mediator complex (CDK-Mediator), with no evidence for MED26 or  
179 RNAPolIII inclusion (Figure 2). CDK8 and its paralogue CDK19 share 77% amino acid identity  
180 (89% similarity) (Audetat et al., 2017) and four out of the five peptides identified by mass  
181 spectrometry were common between the two proteins (data not shown). Therefore, it is likely  
182 that FBXL19 is able to interact with both CDK8- and CDK19-containing Mediator complexes.  
183 Importantly, interaction with CDK-Mediator was also evident when we performed affinity-  
184 purification of endogenous FBXL19 (Figure S2B-D). However, reciprocal  
185 immunopurifications of MED12 and CDK8 failed to yield detectable FBXL19 by Western blot  
186 (Figure S2D). This is in agreement with our mass spectrometry analysis, which indicated that  
187 the association of FBXL19 with CDK-Mediator is sub-stoichiometric, and suggests that this  
188 interaction is likely weak, as opposed to stable, *in vivo*.

189 We next wanted to determine which region of FBXL19 is required for interaction with CDK-  
190 Mediator. To do so, we transiently expressed full length FBXL19 or versions of FBXL19 with  
191 individual domains removed and performed affinity purification followed by Western blot



192 analysis. Intact FBXL19 and a version with the ZF-CxxC domain removed interacted with  
193 CDK-Mediator, whereas removing the F-box domain resulted in a loss of this interaction  
194 (Figure S2E). Therefore, FBXL19 relies on its F-box, and not its capacity to bind non-  
195 methylated DNA, for its association with CDK-Mediator.

196 Based on a candidate approach, it was recently reported that FBXL19 could interact the  
197 RNF20/40 E3 ubiquitin ligase in ES cells and regulate histone H2B lysine 120 ubiquitylation  
198 (H2BK120ub1) (Lee et al., 2017). In our unbiased biochemical purification of FBXL19, we  
199 did not identify an interaction with RNF20/40 by AP-MS or by Western blot analysis (Figure  
200 2A and S2F). Furthermore, we failed to observe any relationship between the ability of  
201 FBXL19 to associate with CpG islands and the levels of H2BK120ub1 (Figure S2G).  
202 Therefore, the relevance of this proposed interaction remains unclear.

203 FBXL19 contains conserved F-box and leucine-rich repeat (LRR) domains. F-box proteins are  
204 known to function as scaffolds and substrate recognition modules for the SKP1-Cullin-F-box  
205 (SCF) protein complexes that ubiquitylate proteins for degradation by the proteasome (Skaar  
206 et al., 2014; Skowyra et al., 1997). Based on the association of FBXL19 with SKP1 and PSME3  
207 we speculated that FBXL19 might function as a SCF substrate-selector for CDK-Mediator, as  
208 has previously been observed for the related F-box-containing protein FBW7 (Davis et al.,  
209 2013). Interestingly, however, in our FBXL19 purifications, we did not detect the SCF complex  
210 components CUL1 and RBX1/2, which are required for ubiquitin E3 ligase activity (Skaar et  
211 al., 2014) (Figure 2A). Nevertheless, we investigated in more detail whether FBXL19 might  
212 regulate CDK-Mediator protein levels. Treatment of ES cells with the proteasome inhibitor  
213 MG132, which sequesters SCF substrates on their substrate selector, did not lead to elevated  
214 levels of Mediator subunits in FBXL19 purifications as identified by AP-MS (unpublished  
215 observation). In addition, transient overexpression of FBXL19 did not cause an appreciable  
216 reduction in CDK-Mediator protein (Figure S2H). Based on these observations we conclude

217 that FBXL19 does not function as a SCF substrate selector for CDK-Mediator. This raised the  
218 interesting possibility that FBXL19 may function in a proteasome-independent manner with  
219 CDK-Mediator at CpG islands.

220

### 221 **FBXL19 recruits CDK-Mediator to chromatin.**

222 It has previously been shown that transcription factors can recruit the Mediator complex to  
223 enhancers and gene promoters (Poss et al., 2013), yet the complement of mechanisms by which  
224 Mediator is targeted to chromatin remains very poorly defined. Given that FBXL19 does not  
225 appear to regulate CDK-Mediator protein levels, we hypothesized that it might instead function  
226 to recruit CDK-Mediator to chromatin. To test this possibility, we took advantage of a synthetic  
227 system we have developed to nucleate proteins *de novo* on chromatin and test their capacity to  
228 recruit additional factors (Blackledge et al., 2014). Fusion of the Tet repressor DNA-binding  
229 domain (TetR) to FBXL19 allowed the recruitment of FBXL19 to a short array of Tet repressor  
230 DNA binding sites (TetO), engineered into a single site on mouse chromosome 8 ((Blackledge  
231 et al., 2014), Figure 3A). To determine whether FBXL19 was sufficient to recruit CDK-  
232 Mediator to chromatin, we stably expressed TetR or the TetR-FBXL19 fusion protein in the  
233 TetO array-containing ES cell line (Figure S3A). We then carried out ChIP for CDK-Mediator  
234 subunits (Figure 3B). Consistent with our biochemical observations (Figure 2), when we  
235 examined the binding of CDK8 and MED12 over the TetO array, we observed an enrichment  
236 in the TetR-FBXL19 line. Furthermore binding of MED4, which is part of the core Mediator  
237 complex, was also evident at the TetO array (Figure 3B). This suggests that FBXL19 may be  
238 sufficient to recruit a holo-CDK-Mediator complex, in keeping with its biochemical co-  
239 purification with multiple components of both the CDK module and core Mediator complex  
240 (Figure 2). Importantly, stable expression of TetR-KDM2A and TetR-KDM2B did not lead to  
241 CDK8 recruitment, indicating that this activity is unique to FBXL19 (Figure S3B). Further

242 work will be required to determine the dynamics with which individual Mediator components  
243 are recruited to chromatin by FBXL19 as well as the precise composition of such complexes.  
244 Together these observations demonstrate that FBXL19 interacts specifically with the CDK-  
245 Mediator and can recruit this complex *de novo* to chromatin.

246

247 **FBXL19 is required for appropriate CDK8 occupancy at a subset of CpG island-**  
248 **associated promoters.**

249 FBXL19 binds specifically to CpG islands (Figure 1) and can recruit CDK-Mediator to an  
250 artificial binding site on chromatin (Figure 3). This raised the interesting possibility that  
251 FBXL19 may help to recruit CDK-Mediator to CpG islands in ES cells. To examine this, we  
252 first performed CDK8 ChIP-seq in ES cells and compared it to FBXL19 ChIP-seq. Unlike  
253 FBXL19, CDK8 occupancy was not restricted to CpG islands (Figure S4A), with only 67.5%  
254 of CDK8 peaks overlapping with NMIs and CDK8 binding showing a limited correlation with  
255 BioCAP signal (Spearman correlation – 0.48, Figure S4B). This is in line with previous studies  
256 demonstrating that the Mediator complex is recruited to both enhancers and gene promoters  
257 (Kagey et al., 2010; Malik and Roeder, 2010). Interestingly, however, we observed enrichment  
258 of CDK8 at FBXL19 peaks (Figure S4C) raising the possibility that FBXL19 may contribute  
259 to its occupancy at these sites. To directly test this, we developed an ES cell system in which  
260 the exon encoding the ZF-CxxC domain of FBXL19 is flanked by loxP sites (*Fbxl19<sup>fl/fl</sup>*) (Figure  
261 S4D) and which expresses tamoxifen-inducible ERT2-Cre recombinase. Upon addition of  
262 tamoxifen (OHT), the ZF-CxxC-encoding exon is excised, yielding a form of FBXL19 that  
263 lacks the ZF-CxxC domain (FBXL19<sup>ΔCXXC</sup>, Figure 4A, 4B, and S4E) and can, therefore, no  
264 longer bind CpG islands (Figure 1). This model cell system allows us to specifically examine  
265 the CpG island-associated functions of FBXL19 without affecting its other proposed roles  
266 (Dong et al., 2014; Wei et al., 2013; Zhao et al., 2013; Zhao et al., 2012). Following removal

267 of the ZF-CxxC domain of FBXL19, we observed some reductions in FBXL19 protein levels  
268 (Figure 4B), but importantly CDK8 levels were unaffected (Figure S4F). Using this conditional  
269 *Fbxl19<sup>ACXXC</sup>* ES cell line, we then examined CDK8 occupancy on chromatin by ChIP-seq  
270 before and after OHT treatment. Genome-wide profiling of CDK8 in *Fbxl19<sup>ACXXC</sup>* ES cells did  
271 not reveal widespread alterations in CDK8 binding (Figure 4C left and S4G), indicating that  
272 FBXL19 is not the central determinant driving CDK8 recruitment to most of its binding sites  
273 in the genome. Intriguingly, however, a more detailed site-specific analysis revealed a subset  
274 of CDK8 target sites that displayed significant alteration in CDK8 occupancy (Figure 4C, 4D,  
275 and S4G). In keeping with a potential role for FBXL19 in CDK8 recruitment, the majority of  
276 the affected sites showed reduced CDK8 binding (n=783) (Figure 4C).

277 Upon closer examination of sites with reduced CDK8 occupancy in *Fbxl19<sup>ACXXC</sup>* ES cells, we  
278 discovered that they tended to coincide with broad regions of CDK8 enrichment (Figure 4E  
279 and F), a feature often associated with super-enhancers (Whyte et al., 2013). However, a  
280 comparison of these sites to the location of super-enhancers in mouse ES cells indicated that  
281 these were distinct (Figure 4G). Instead, sites displaying reduction in CDK8 occupancy  
282 coincided with broad regions of non-methylated DNA (Figure 4D, 4H, and S4G), tended to be  
283 associated with gene promoters (Figure S4H), and had elevated levels of FBXL19 (Figure 4I,  
284 S4G, S4H, and S4I). Together, these observations suggest that although binding of CDK8 to  
285 most of its target sites in the genome is achieved independently of FBXL19, a subset of broad  
286 CpG island-associated gene promoters appear to rely on FBXL19 for appropriate CDK8  
287 occupancy.

288

289 **FBXL19 targets CDK8 to promoters of silent developmental genes in ES cells.**

290 Despite associating widely with CpG island gene promoters, FBXL19 appears to play a very  
291 specific role in maintaining appropriate CDK8 occupancy at a particular subset of broad CpG  
292 island-associated promoters (Figure 4). We were therefore curious to know whether something  
293 distinguishes these gene promoters from other FBXL19-bound promoters, where FBXL19  
294 does not contribute appreciably to CDK8 occupancy (Figure S4G). To achieve this, we initially  
295 performed gene ontology (GO) analysis (Huang da et al., 2009) on the genes with reduced  
296 CDK8 levels at their promoters in *Fbxl19*<sup>ΔCXXC</sup> ES cells. Interestingly, this revealed that these  
297 genes were strongly enriched for developmental processes (Figure 5A) in agreement with our  
298 previous discovery that broad CpG islands are an evolutionary conserved feature of  
299 developmentally regulated genes (Long et al., 2013b). In contrast, genes associated with an  
300 increased binding of CDK8 did not show any significant GO term enrichment (unpublished  
301 observation).

302 In pluripotent mouse ES cells, many developmental genes are inactive and only become  
303 expressed as cells commit to more differentiated lineages (Boyer et al., 2006). Importantly, the  
304 genes that exhibited reductions in CDK8 binding in *Fbxl19*<sup>ΔCXXC</sup> cells were expressed at  
305 significantly lower levels than most other genes in ES cells (Figure 5B). Previous work has  
306 identified a subset of poised but inactive developmental genes in ES cells that are proposed to  
307 exist in a bivalent chromatin state characterised by the co-occurrence of histone H3 lysine 4  
308 and 27 methylation (H3K4/K27me) (Bernstein et al., 2006; Mikkelsen et al., 2007). Therefore,  
309 we examined whether sites that rely on FBXL19 for normal CDK8 binding also corresponded  
310 to bivalent regions in ES cells. We found that these regions are enriched for H3K27me3 (Figure  
311 S5A) and have elevated H3K4me3 compared to other H3K27me3 modified sites that lack  
312 CDK8 (Figure S5B). Therefore, sites that rely on FBXL19 for normal CDK8 binding and  
313 correspond to silent developmental gene promoters are also bivalent. To ask whether these  
314 genes are induced during cell lineage commitment, we compared their expression levels in ES

315 cells and following retinoic acid (RA) treatment which induces differentiation (Figure S6B and  
316 S6C). This clearly demonstrated that the genes which rely on FBXL19 for appropriate CDK8  
317 binding in the ES cell state can become transcriptionally activated during stem cell lineage  
318 commitment (Figure 5C).

319 The observation that FBXL19 appears to be important for CDK8 occupancy at largely inactive  
320 genes was intriguing given that previous work characterising Mediator function has usually  
321 focussed on its activity at actively transcribed or induced genes (reviewed in (Poss et al.,  
322 2013)). We therefore set out to examine the relationship between FBXL19, CDK8 and gene  
323 expression in more detail. We first separated all promoters based on expression of their  
324 associated gene (Figure 5D and S5D). We observed that CDK8 occupancy was in general  
325 linked to gene activity (Figure 5E), in agreement with previous reports (Alarcon et al., 2009;  
326 Bancerek et al., 2013; Donner et al., 2010; Donner et al., 2007; Fryer et al., 2004; Galbraith et  
327 al., 2013). However, at FBXL19-bound gene promoters, CDK8 occupancy was similar in both  
328 the lowly and highly expressed subsets of genes (Figure 5E). Importantly, CDK8 occupancy at  
329 promoters of lowly expressed genes was reduced in *Fbxl19*<sup>ΔCXXC</sup> ES cells (Figure 5F).  
330 Therefore, these observations reveal that CDK8 is enriched at promoters of inactive or lowly  
331 expressed genes in ES cells and its binding is dependent on recognition of CpG islands by  
332 FBXL19.

333

334 **Removing the CpG island-binding domain of FBXL19 results in a failure to induce**  
335 **developmental genes during ES cell differentiation.**

336 FBXL19 appears to play a role in recruiting CDK8 to a class of genes that are repressed in the  
337 ES cell state and become activated during cell lineage commitment (Figure 5). However, it  
338 remained unclear whether FBXL19 is required for the activation of these developmental genes.

339 To address this question, we induced differentiation of *Fbxl19<sup>fl/fl</sup>* and *Fbxl19<sup>ΔCXXC</sup>* ES cells with  
340 RA (Figure 6A) and compared the expression of several genes which showed reduced CDK8  
341 binding in *Fbxl19<sup>ΔCXXC</sup>* ES cells (Figure 6B). We observed no significant differences in the  
342 expression of these genes in wild type *Fbxl19<sup>fl/fl</sup>* and *Fbxl19<sup>ΔCXXC</sup>* ES cells where these genes  
343 are silent. Strikingly however, following RA treatment, *Fbxl19<sup>ΔCXXC</sup>* cells failed to induce these  
344 genes appropriately (Figure 6B). Similarly, developmental genes were not appropriately  
345 induced during embryoid body differentiation of *Fbxl19<sup>ΔCXXC</sup>* ES cells (Figure S6A).  
346 Importantly, this demonstrates that FBXL19 is required for the appropriate activation of  
347 developmental gene expression during cell lineage commitment.

348 To understand the extent to which genes are not appropriately induced during differentiation  
349 of *Fbxl19<sup>ΔCXXC</sup>* ES cells, we examined ongoing transcription in both the ES cell state and after  
350 RA-mediated differentiation using short time-scale 4-thiouridine-based labelling and RNA  
351 sequencing (4sU RNA-seq) (Figure 6A). We observed a significant number of genes that  
352 become induced upon RA treatment in wild type cells (n=4051, Figure S6B). GO term analysis  
353 confirmed that these genes are associated with ES cell differentiation and early embryonic  
354 development (Figure S6C). We then used differential gene expression analysis to compare  
355 transcription in *Fbxl19<sup>fl/fl</sup>* and *Fbxl19<sup>ΔCXXC</sup>* cells (Figure 6C). While very few significant  
356 changes in gene expression were observed in the ES cell state, following RA-induced  
357 differentiation we identified a large number of genes (n=552) that had significantly lower  
358 expression levels in *Fbxl19<sup>ΔCXXC</sup>* cells (Figure 6C). This is consistent with our results when  
359 examining individual genes (Figure 6B and S6A) and with a recent study where the expression  
360 of a selection of genes was examined following FBXL19 knock-down (Lee et al., 2017). GO  
361 analysis revealed that the set of genes that were not appropriately activated were associated  
362 with genes involved in developmental processes (Figure 6D), unlike genes with increased  
363 expression which were not associated with these processes (Figure S6D). Consistent with our



364 analysis of FBXL19-dependent CDK8 occupancy at promoters of developmental genes (Figure  
365 5B and 5C), these genes were lowly expressed in wild type ES cells (Figure 6E) and tended to  
366 become activated following RA induction (Figure 6F). Importantly, these genes exhibited a  
367 reduction in CDK8 binding in *Fbxl19<sup>ΔCXXC</sup>* ES cells (Figure 6G and S6E), supporting the idea  
368 that FBXL19 recruits CDK8 to this subset of CpG island-associated developmental genes and  
369 that this may prime these genes for activation during differentiation.

370

### 371 **FBXL19 target genes rely on CDK-Mediator for activation during differentiation**

372 Given that FBXL19 is required for CDK8 occupancy at the promoters of a series of silent  
373 developmental genes and for their activation during differentiation (Figure 5 and 6), we  
374 hypothesized that FBXL19 may prime these genes for future activation through the activity of  
375 CDK-Mediator. To address this interesting possibility, we developed a system to inducibly  
376 remove MED13 and its closely related paralogue MED13L in ES cells (*Med13/13L<sup>fl/fl</sup>* ERT2-  
377 Cre ES cells, Figure 7A and S7A). We chose to inactivate MED13/13L as it has previously  
378 been shown to physically link the CDK-kinase module to the core Mediator complex and  
379 underpin the formation of a functional CDK-Mediator (Knuesel et al., 2009; Tsai et al., 2013).  
380 Treatment of the *Med13/13L<sup>fl/fl</sup>* ES cells with OHT resulted in a loss of MED13 and MED13L  
381 protein (MED13/13L KO) and reduced levels of the other subunits of the CDK-kinase module  
382 (Figure 7B). Importantly, removal of MED13/13L also led to a loss of CDK8 binding to  
383 chromatin (Figure 7C) but did not have an appreciable effect on the expression of FBXL19  
384 target genes in the ES cell state (Figure 7D). We next induced differentiation of the  
385 MED13/13L KO cells with RA (Figure 7A). Importantly, when we then analysed the  
386 expression of a series of genes that rely on FBXL19 for activation during differentiation (Figure  
387 7D), we observed that these genes also failed to appropriately induce in MED13/13L KO cells  
388 (Figure 7D). Together this suggests that FBXL19, via its association with CpG islands,



389 recognises a subset of silent developmental genes in ES cells in order to recruit the CDK-  
390 Mediator complex and prime these genes for future activation.

391

### 392 **Ablating the capacity of FBXL19 to bind CpG islands causes embryonic lethality.**

393 Our results suggest that FBXL19 contributes to gene activation during cell lineage commitment  
394 via recognition of CpG islands and recruitment of the CDK-Mediator complex. Given that  
395 *Fbxl19<sup>ΔCXXC</sup>* cells display impaired gene activation in our *in vitro* differentiation model, we  
396 asked whether the inability of FBXL19 to bind and function at CpG islands could also affect  
397 mouse development. In order to address this, we generated *Fbxl19<sup>ΔCXXC</sup>* mutant mice by  
398 crossing *Fbxl19<sup>fl/fl</sup>* animals with animals constitutively expressing Cre recombinase. From  
399 these crosses, we failed to obtain any viable *Fbxl19<sup>ΔCXXC</sup>* homozygous offspring, indicating that  
400 removal of the ZF-CxxC domain of FBXL19 leads to embryonic lethality (Figure 8A). We then  
401 investigated at which stage *Fbxl19<sup>ΔCXXC</sup>* homozygous embryos were affected and found  
402 homozygous embryos were observed at normal Mendelian ratios until 10.5 days postcoitum  
403 (dpc) (Figure 8A). At 9.5 dpc, gross embryonic morphology appeared to be intact but at 10.5  
404 dpc (Figure 8B), the embryos exhibited a clear growth retardation and showed, to varying  
405 extents, reduced elongation of the trunk, hypomorphic limb buds and cephalic region. This  
406 included undeveloped facial mesenchyme, including defects in maxillary and mandibular  
407 components of first branchial arches (indicated by yellow and red arrows in Figure 8B,  
408 respectively), and hypomorphic cardiac mesenchyme. Some living *Fbxl19<sup>ΔCXXC</sup>* homozygous  
409 embryos, characterized by a beating heart, were observed at 12.5 dpc but they were of similar  
410 size and external appearance to 10.5 dpc mutant embryos suggesting that normal development  
411 had ceased by this point. Together our findings demonstrate that FBXL19, and its ability to  
412 recognize CpG islands, is essential for normal mouse embryonic development.

## 413 **Discussion**

414 Here we discover that FBXL19 recognizes CpG islands throughout the genome in a ZF-CxxC-  
415 dependent manner (Figure 1). Unlike other ZF-CxxC proteins which associate with chromatin-  
416 modifying complexes, we show that FBXL19 interacts with the CDK-Mediator complex  
417 (Figure 2). This uncovers an unexpected link between CpG islands and a complex that regulates  
418 gene expression through interfacing with the transcriptional machinery. We demonstrate that  
419 FBXL19 can recruit CDK-Mediator to chromatin (Figure 3) and, via recognition of CpG  
420 islands, plays an interesting role in supporting CDK8 occupancy at a subset of promoters  
421 associated with developmental genes, which are inactive in ES cells (Figure 4 and 5). At these  
422 CpG islands, FBXL19 and CDK-Mediator function to prime the associated genes for activation  
423 during ES cell differentiation (Figure 6 and 7). Consistent with an important role of FBXL19  
424 in supporting normal developmental gene expression, removal of the ZF-CxxC domain of  
425 FBXL19 leads to perturbed development and embryonic lethality in mice (Figure 8). Together  
426 these new discoveries reveal that CpG islands and FBXL19 can interface with CDK-Mediator  
427 to orchestrate normal gene expression during lineage commitment.

428 Previously, another F-box protein, FBW7, was shown to function as an E3 ubiquitin ligase  
429 substrate selector for the MED13/13L subunit of CDK-Mediator and to regulate its stability  
430 through proteasomal degradation (Davis et al 2013). By controlling CDK-Mediator abundance,  
431 one could envisage how this might shape Mediator function in gene expression. FBXL19 also  
432 encodes an F-box domain and associates with SKP1, a central component of SCF E3 ubiquitin  
433 ligase complexes. However, we do not find evidence that FBXL19 regulates CDK-Mediator  
434 stability via the proteasome (Figure S2H). Instead, we discover that FBXL19 can recruit CDK-  
435 Mediator to chromatin and, more specifically, to CpG islands via its ZF-CxxC domain to  
436 support gene activation. Although we currently do not know the defined subunits and surfaces  
437 in CDK-Mediator that FBXL19 interacts with, our biochemical experiments indicate that this

438 relies on an intact F-box domain in FBXL19 (Figure S2E). It is tempting to speculate that  
439 FBXL19 could interact directly with MED13/13L given their recognition by the related F-box  
440 protein, Fbw7 (Davis et al., 2013). Nevertheless, a key observation in our work is that FBXL19  
441 appears to have functionally diverged from other F-box proteins during vertebrate evolution by  
442 acquiring a DNA-binding domain that allows it to recruit proteins to chromatin, instead of  
443 targeting them for ubiquitylation. This general feature is shared with the FBXL19 paralogue,  
444 KDM2B, which associates with and recruits the PRC1 complex to CpG islands (Farcas et al.,  
445 2012; He et al., 2013; Wu et al., 2013). In agreement with our observations, a large-scale  
446 proteomics screen previously suggested that an interaction between FBXL19 and Mediator  
447 may also exist in cancer cells (Tan et al., 2013). Given that CDK8 can function as an oncogene  
448 (Adler et al., 2012; Firestein et al., 2008; Morris et al., 2008), it will be interesting to understand  
449 whether FBXL19 plays a role in targeting CDK-Mediator to CpG islands in non-embryonic  
450 tissues, and whether this activity may promote CDK8-driven tumorigenesis.

451 Individual Mediator subunits have been shown to interact with DNA-binding transcription  
452 factors that recruit the Mediator complex to specific DNA sequences in regulatory elements  
453 and support gene expression (Black et al., 2006; Blazek et al., 2005; Fondell et al., 1996; Malik  
454 and Roeder, 2010). In part, Mediator is thought to achieve this by bridging enhancer elements  
455 to the core gene promoter and RNAPolIII (Allen and Taatjes, 2015; Jeronimo et al., 2016;  
456 Petrenko et al., 2016). However, in mammals these proposed mechanisms are extrapolated  
457 from studying only a subset of transcription factors and genes. Therefore, the defined  
458 mechanisms that shape Mediator occupancy on chromatin remain very poorly understood. Here  
459 we provide evidence for a completely new gene promoter-associated CDK-Mediator targeting  
460 mechanism that relies on FBXL19 and CpG island recognition. Surprisingly, although  
461 FBXL19 localises broadly to CpG islands throughout the genome (Figure 1), we only observed  
462 a reliance on FBXL19 for CDK8 binding at a subset of sites (Figure 4). Similarly, KDM2B

463 binds broadly to CpG islands, yet has a specificity in shaping PRC1 recruitment and polycomb  
464 repressive chromatin domain formation at a subset of developmental genes in mouse ES cells  
465 (Farcas et al., 2012). We have previously suggested that this could result from ZF-CxxC  
466 domain-containing proteins broadly sampling CpG islands, with their activity or affinity for  
467 certain sites being shaped by local gene activity or chromatin environment (Klose et al., 2013).  
468 In keeping with these general ideas, FBXL19 is required for appropriate CDK8 binding at  
469 bivalent genes in ES cells (Figure S5A and S5B). In future work, it will be important to  
470 understand whether this unique chromatin state and/or the absence of transcriptional activity at  
471 these sites define the requirement for FBXL19 in CDK8 recruitment, or whether FBXL19  
472 targeting occurs at most CpG islands sites but is masked through redundancy with transcription  
473 factor and gene activity-dependent targeting modalities.

474 Historically, CDK-Mediator has been associated with gene repression (Akoulitchev et al.,  
475 2000; Chi et al., 2001; Elmlund et al., 2006; Hengartner et al., 1998; Knuesel et al., 2009; Pavri  
476 et al., 2005). Therefore, we were not surprised to observe that CDK8 occupied the promoters  
477 of repressed developmental genes in ES cells. While abrogating the CpG island-binding  
478 activity of FBXL19 or deletion of MED13/13L resulted in reduced CDK8 binding at these  
479 sites, it did not lead to an appreciable effect on gene expression in the ES cell state (Figure 6,  
480 S6C, and 7D). This suggests that CDK-Mediator is not required for the repression of these  
481 genes in ES cells. Instead, these genes fail to properly activate during differentiation (Figure 6,  
482 S6, and 7D). These observations are in line with several reports that support the idea that CDK-  
483 Mediator is also involved in gene activation (Alarcon et al., 2009; Donner et al., 2007; Hirst et  
484 al., 1999; Donner et al., 2010; Galbraith et al., 2013). Therefore, in the context of mouse ES  
485 cells, we propose that CDK-Mediator may be required to prime silent developmental genes for  
486 future gene activation through a mechanism that relies on the recognition of CpG island  
487 promoters by FBXL19. This priming could contribute to gene activation during differentiation

488 through one of the several mechanisms by which CDK-Mediator has been proposed to affect  
489 gene transcription, including regulating RNAPolIII pre-initiation complex assembly,  
490 polymerase pausing/elongation, or through mediating long range interactions with distal  
491 regulatory elements (Allen and Taatjes, 2015; Belakavadi and Fondell, 2010; Donner et al.,  
492 2010; Galbraith et al., 2013; Kagey et al., 2010). Clearly, understanding the defined mechanism  
493 by which FBXL19-dependent CDK-Mediator recruitment supports normal gene activation  
494 during differentiation remains an important question for future work.

495 Our finding that FBXL19 can target CDK8 to gene promoters and that this is required to prime  
496 the expression of developmental genes during ES cell differentiation is conceptually  
497 reminiscent of recent work in yeast and human systems which suggested that CDK8 is required  
498 for appropriate re-induction of inducible genes following an initial activation stimulus (D'Urso  
499 et al., 2016). In this study, CDK8 was found to associate with the promoters of inducible genes  
500 following initial activation, even in the absence of appreciable ongoing gene transcription,  
501 thereby acting as a form of transcriptional memory (D'Urso et al., 2016). Interestingly, this  
502 requirement for CDK8 in normal gene activation appears shared in the context of our  
503 developmental gene induction paradigm. However, we find that, in the case of developmental  
504 genes, previous gene activation may not be required for the recruitment of CDK8. Instead, this  
505 could be achieved by FBXL19 directly recognising and targeting CDK8 to CpG islands.  
506 Therefore, we prefer to view this as priming as opposed to memory. Nevertheless, collectively  
507 these observations point to an important role for CDK-Mediator binding to gene promoters  
508 prior to activation and as a way of supporting subsequent gene induction. This provides new  
509 evidence that the roles of CDK-Mediator in gene regulation are more complicated than simply  
510 conveying activation signals to RNAPolIII through recruitment by transcription factors and  
511 suggests it may have evolved to play a unique role in regulating gene expression in stem cells  
512 and during development.

## 513 **Material and Methods**

### 514 **Cell culture**

515 Mouse ES cells were cultured on gelatine-coated dishes in DMEM (Thermo scientific)  
516 supplemented with 15% fetal bovine serum (BioSera), L-Glutamine, beta-mercaptoethanol,  
517 non-essential amino acids, penicillin/streptomycin (Thermo scientific) and 10ng/mL leukemia-  
518 inhibitory factor. *Fbxl19<sup>fl/fl</sup>* ES cells were treated with 800nM 4-hydroxytamoxifen (Sigma) for  
519 96 hours in order to delete the Zf-CxxC domain. For RA differentiation of ES cells,  $4 \times 10^4$   
520 cells/cm<sup>2</sup> were allowed to attach to gelatinised dishes (~12 hours) and treated with 1μM retinoic  
521 acid (Sigma-Aldrich) in EC-10 medium (DMEM supplemented with 10% fetal bovine serum,  
522 L-Glutamine, beta-mercaptoethanol, non-essential amino acids and penicillin/streptomycin)  
523 for 72 hours. For embryonic body differentiation,  $2 \times 10^6$  cells were plated on non-adhesive  
524 10cm dishes in EC-10 medium and cultured for the indicated days. For generation of stable  
525 cell lines, E14 ES cells were transfected using Lipofectamine 2000 (Thermo scientific)  
526 following manufacturer's instructions. Stably transfected cells were selected for 10 days using  
527 1μg/ml puromycin and individual clones were isolated and expanded in the presence of  
528 puromycin to maintain the transgene expression. TOT2N E14 cells used for TetR targeting  
529 experiments were previously described (Blackledge et al., 2014). 293T cells were cultured in  
530 EC-10 media. Transient overexpression of FBXL19 was performed by transfecting 293T cells  
531 using Lipofectamine 2000 (Thermo scientific) followed by selection with 400ng/μl G418 for  
532 48 hours. Proteasome inhibition was performed for 4 hours using 10μM MG132 inhibitor  
533 (Sigma-Aldrich).

534

### 535 **Generation of *Fbxl19<sup>ΔCXXC</sup>* conditional knockout mouse**

536 The targeting construct was generated from C57BL6/J mouse genomic sequence spanning  
537 mm9 chromosome 7: 134,888,487-134,895,358 containing the exons 1 to 6 of *Fbxl19* genomic  
538 region. Recombination was carried out by Gateway system (Life Technologies). One of the  
539 loxP sequences was inserted at mm9 chr7:134,891,537, and FRT flanked PGK-neo was  
540 inserted at mm9 chr7:134,892,000 together with an additional loxP sequence. The targeting  
541 construct was electroporated into M1 ES cells to obtain targeted insertion. Clones of targeted  
542 ES cells were aggregated with 8-cell embryos to generate the targeted mouse line. The  
543 *Fbxl19<sup>fl/fl</sup>* line was generated by removal of the PGK-neo marker gene by mating the targeted  
544 mice with mice expressing FLP recombinase. These *Fbxl19<sup>fl/fl</sup>* mice were further mated with  
545 mice harbouring the *ROSA26-CreErt2* locus to generate *Fbxl19<sup>fl/fl</sup>·ROSA26-CreErt2<sup>+/-</sup>* mice,  
546 from which the *Fbxl19<sup>fl/fl</sup>* ES cells used in this study were derived.

547

#### 548 **Generation of *Med13/13L<sup>fl/fl</sup>* conditional ES cells line**

549 In order to generate a conditional *Med13/13L<sup>fl/fl</sup>* ES cell line, we inserted loxP sites downstream  
550 of exons 7 and upstream of exons 8 of the *Med13* and *Med13L* genes. The targeting constructs  
551 for the insertion of each loxP site were designed to have 150bp homology arms flanking the  
552 loxP site and to carry a mutated PAM sequence to prevent retargeting by the Cas9 enzyme.  
553 The targeting constructs were purchased from GeneArt Gene Synthesis (Thermofisher  
554 scientific). The pSpCas9(BB)-2A-Puro(PX459)-V2.0 vector was obtained by Addgene  
555 (#62988). sgRNAs were designed to specifically target the desired genomic region for each  
556 loxP insertion (<http://crispor.tefor.net/crispor.py>) and were cloned into the Cas9 vector as  
557 previously described (Ran et al., 2013). ES cells that express the ERT2-Cre recombinase from  
558 the *ROSA26* locus (*ROSA26:ERT2-Cre*) were used. First, the downstream loxP sites for *Med13*  
559 and *Med13L* were targeted. *ROSA26:ERT2-Cre* ES cells were transiently co-transfected with  
560 1µg of each Cas9-sgRNA plasmid and 3.5µg of each targeting construct using Lipofectamine



561 3000 (ThermoFischer Scientific). Successfully transfected ES cells were selected for 48 hours  
562 with 1µg/ml puromycin. Individual clones were screened by genotyping PCR to identify  
563 correctly targeted homozygous clones. A clone homozygous for both Med13 and Med13L  
564 LoxP1 sites was then used to target the upstream loxP sites using the same transfection protocol  
565 and screening strategy. Correct loxP targeting was verified by sequencing of the genomic  
566 region surround the loxP sites.

567

### 568 **DNA constructs**

569 For generation of FBXL19 expression constructs, the full length,  $\Delta$ CxxC or  $\Delta$ F-box cDNA of  
570 mouse *Fbxl19* (IMAGE ID 6401846, Source Bioscience) was PCR amplified and inserted into  
571 a pCAG-IRES-FS2 vector (Farcas et al., 2012) via ligation-independent cloning (LIC).  
572 Mutation of the ZF-CxxC domain of FBXL19 (K49A) was generated via site-directed  
573 mutagenesis using the Quikchange mutagenesis XL kit (Stratagene). To generate TetR-  
574 FBXL19 fusion expression plasmid, *Fbxl19* cDNA was cloned into pCAG-FS2-TetR  
575 (Blackledge et al., 2014) via LIC. For transient overexpression in 293T cells, full length  
576 FBXL19 cDNA was cloned into pcDNA3-2xFlag vector by conventional cloning. All plasmids  
577 were sequence-verified by sequencing.

578

### 579 **Nuclear extract preparation and immunoprecipitation**

580 Cells were harvested by scraping in PBS at 4°C, resuspended in 10x pellet volume (PV) of  
581 Buffer A (10mM Hepes pH 7.9, 1.5mM MgCl<sub>2</sub>, 10mM KCl, 0.5mM DTT, 0.5mM PMSF,  
582 cOmplete protease inhibitor cocktail (Roche)) and incubated for 10 min at 4°C with slight  
583 agitation. After centrifugation, the cell pellet was resuspended in 3x PV Buffer A containing  
584 0.1% NP-40 and incubated for 10 min at 4°C with slight agitation. Nuclei were recovered by



585 centrifugation and the soluble nuclear fraction was extracted for 1 hour at 4°C with slight  
586 agitation using 1x PV Buffer C (10mM Hepes pH 7.9, 400mM NaCl, 1.5mM MgCl<sub>2</sub>, 26%  
587 glycerol, 0.2mM EDTA, cOmplete protease inhibitor cocktail). Protein concentration was  
588 measured using Bradford assay.

589 For small-scale co-immunoprecipitation, 600µg of nuclear extract was diluted in BC150 buffer  
590 (50mM Hepes pH 7.9, 150mM KCl, 0.5mM EDTA, 0.5mM DTT, cOmplete protease inhibitor  
591 cocktail). Samples were incubated with the respective antibodies and 25U benzonase nuclease  
592 overnight at 4°C. Protein A agarose beads (RepliGen) were blocked for 1 hour 4°C in Buffer  
593 BC150 containing 1% fish skin gelatine (Sigma) and 0.2 mg/ml BSA (NEB). The blocked  
594 beads were added to the samples and incubated for 4 hours at 4°C. Washes were performed  
595 using BC150 containing 0.02% NP-40. The beads were resuspended in 2x SDS loading buffer  
596 and boiled for 5 minutes to elute the immunoprecipitated complexes.

597 Purification of FBXL19-FS2 was performed using StrepTactin resin (IBA) as previously  
598 described with the exception of the wash buffer used (20 mM Tris pH 8.0, 150 mM NaCl, 0.2%  
599 NP-40, 1 mM DTT, 5% glycerol, cOmplete protease inhibitor cocktail) (Farcas et al., 2012).  
600 Between 10-15mg of nuclear extract was used for each large scale purification. The samples  
601 were treated with 75U/mL benzonase nuclease (Novagen) in order to disrupt nucleic acid-  
602 mediated interactions.

### 603 **Mass spectrometry**

604 Samples from FBXL19-FS2 affinity purifications were subjected to in-solution trypsin  
605 digestion and mass spectrometry analysis was performed as described previously (Farcas et al.,  
606 2012). Two biological replicates were performed. A control EV purification was included in  
607 each replicate. An interaction with identified proteins was only considered significant if absent  
608 from the EV data.

## 609 **Antibodies**

610 Antibodies used for IP were rabbit anti-MED12 (A300-774A, Bethyl laboratories), rabbit anti-  
611 CDK8 (A302-500A, Bethyl laboratories), rabbit anti-HA (3724, Cell Signaling Technology).  
612 A polyclonal antibody against FBXL19 was prepared in-house by rabbit immunisation  
613 (PTU/BS Scottish National Blood Transfusion Service) with a recombinant peptide encoding  
614 for amino acids 137-336 of mouse FBXL19 protein. The FBXL19 peptide antigen was coupled  
615 to Affigel 10 resin (BioRad) and the antibody was affinity-purified and concentrated.

616 Antibodies used for Western blot analysis were mouse anti-Flag M2 (F1804, Sigma-Aldrich),  
617 mouse anti-SKP1 (sc-5281, Santa Cruz), goat anti-CDK8 (sc-1521, Santa Cruz), rabbit anti-  
618 MED12 (A300-774A, Bethyl laboratories), rabbit anti-MED13L (A302-420A, Bethyl  
619 laboratories), rabbit anti-MED13 (GTX129674, Genetex), rabbit anti-MED1, (A300-793A,  
620 Bethyl laboratories), rabbit anti-MED26 (A302-370A, Bethyl laboratories), rabbit anti-T7  
621 (13246, Cell Signaling Technology), rabbit anti-TBP (ab818, Abcam), rabbit anti-RNF20  
622 (11974, Cell Signaling Technology), rabbit anti-ubiquityl-Histone H2B (Lys120) (5546, Cell  
623 Signaling Technology), and mouse anti-ubiquityl-Histone H2B (Lys120) (05-1312, Millipore).

624

## 625 **Generation of T7-FBXL19 ES cell line**

626 As the FBXL19 antibody failed to work reliably for Western blot analysis, we generated an  
627 *Fbxl19*<sup>fl/fl</sup> ES cell line in which the endogenous *Fbxl19* gene is tagged with a 3xT7-2xStrepII  
628 tag by CRISPR/Cas9 knock-in (Supplementary Figure S2C). This allowed us to determine the  
629 efficiency of the OHT treatment and endogenous IPs. The tag was synthesised by GeneArt  
630 (ThermoFischer Scientific) and the targeting construct was generated by PCR amplification to  
631 introduce roughly 150bp homology arms flanking the 3xT7-2xStrepII tag. The PCR product  
632 was cloned into pGEM®-T Easy Vector (Promega). The pSpCas9(BB)-2A-Puro vector was

633 obtained by Addgene (#48139). A sgRNA was designed to overlap with the stop codon of the  
634 *Fbxl19* gene (<http://crispr.mit.edu/>) and cloned into the Cas9 vector as previously described  
635 (Ran et al., 2013). *Fbxl19*<sup>fl/fl</sup> ES cells were transiently co-transfected with 1µg of Cas9-sgRNA  
636 plasmid and 3.5µg of targeting construct using Lipofectamine 3000 (ThermoFischer  
637 Scientific). Successfully transfected ES cells were selected for 48 hours with 1µg/ml  
638 puromycin. Individual clones were screened by Western blot and genotyping PCR to identify  
639 homozygous targeted clones.

640

#### 641 **Chromatin immunoprecipitation**

642 Chromatin immunoprecipitation was performed as described previously (Farcas et al., 2012)  
643 with slight modifications. Cells were fixed for 45 min with 2mM DSG (Thermo scientific) in  
644 PBS and 12.5 min with 1% formaldehyde (methanol-free, Thermo scientific). Reactions were  
645 quenched by the addition of glycine to a final concentration of 125µM. After cell lysis and  
646 chromatin extraction, chromatin was sonicated using a BioRuptor Pico sonicator (Diagenode),  
647 followed by centrifugation at 16,000×g for 20min at 4°C. 200µg chromatin diluted in ChIP  
648 dilution buffer (1% Triton-X100, 1mM EDTA, 20mM Tris-HCl (pH 8.0), 150mM NaCl) was  
649 used per IP. Chromatin was precleared with protein A Dynabeads blocked with 0.2mg/ml BSA  
650 and 50µg/ml yeast tRNA and incubated with the respective antibodies overnight at 4°C.  
651 Antibody-bound chromatin was purified using blocked protein A Dynabeads for 3 hours at  
652 4°C. ChIP washes were performed as described previously (Farcas et al., 2012). ChIP DNA  
653 was eluted in ChIP elution buffer (1% SDS, 100mM NaHCO<sub>3</sub>) and reversed cross-linked  
654 overnight at 65°C with 200mM NaCl and RNase A (Sigma). The reverse cross-linked samples  
655 were treated with 20µg/ml Proteinase K and purified using ChIP DNA Clean&Concentrator™  
656 kit (Zymo research).

657 The antibodies used for ChIP experiments were rabbit anti-FS2 (Farcas et al., 2012), rabbit  
658 anti-CDK8 (A302-500A, Bethyl laboratories), rabbit anti-MED12 (A300-774A, Bethyl  
659 laboratories), mouse anti-MED4 (PRC-MED4-16, DSHB), rabbit anti-SKP1 (12248, Cell  
660 Signaling Technology), rabbit anti-KDM2A (Farcas et al., 2012), rabbit anti-KDM2B (Farcas  
661 et al., 2012).

662

### 663 **ChIP-sequencing**

664 All ChIP-seq experiments were carried out in biological duplicates. ChIP-seq libraries for FS2-  
665 FBXL19 ChIP were prepared using the NEBNext Fast DNA fragmentation and library  
666 preparation kit for Ion Torrent (NEB, E6285S) following manufacturer's instructions. Briefly,  
667 30-40ng ChIP or input DNA material was used. Libraries were size-selected for 250bp  
668 fragments using 2% E-gel SizeSelect gel (Thermo scientific) and amplified with 6 PCR cycles  
669 or used without PCR amplification. Templates were generated with Ion PI™ Template OT2  
670 200 kit v3 and Ion PI™ Sequencing 200 kit v3, or with Ion PI IC 200 kit (Thermo scientific).  
671 Libraries were sequenced on the Ion Proton Sequencer using Ion PI™ chips v2 (Thermo  
672 scientific).

673 ChIP-seq libraries for CDK8 ChIP were prepared using the NEBNext Ultra DNA Library Prep  
674 Kit, and sequenced as 40bp paired-end reads on Illumina NextSeq500 platform using  
675 NextSeq® 500/550 (75 cycles).

676

### 677 **Reverse transcription and gene expression analysis**

678 Total RNA was isolated using TRIzol reagent (Thermo scientific) following manufacturer's  
679 instructions and cDNA was synthesised from 400ng RNA using random primers and ImProm-

680 II Reverse Transcription system kit (Promega). RT-qPCR was performed using SensiMix™  
681 SYBR® mix (Bioline). Idh1 and Atp6IP1 genes were used as house-keeping controls.

682

### 683 **4sU-labelling of nascent RNA transcripts**

684 For labelling of nascent RNA transcripts, cells were grown in 15cm culture dishes. Labelling  
685 was performed for 20 minutes at 37°C by the addition of 50mM 4-thiouridine (T4509, Sigma)  
686 to the culture medium. After the incubation, the medium was removed and RNA was isolated  
687 using TRIzol reagent (Thermo scientific) following manufacturer's instructions. The total  
688 RNA was treated with TURBO DNA-free kit (Ambion, Thermo scientific) in order to remove  
689 contaminating genomic DNA. 300µg RNA was biotinylated using 600µg Biotin-HPDP  
690 (21341, Pierce, Thermo scientific) in Biotinylation buffer (100mM Tris-HCl pH 7.4, 10mM  
691 EDTA). The reaction was carried out for one and half hour on a rotor at room temperature.  
692 Unincorporated Biotin-HPDP was removed by chloroform/isoamylalcohol (24:1, Sigma) wash  
693 followed by isopropanol precipitation of the biotinylated RNA. Labelled biotinylated RNA was  
694 isolated using µMacs Streptavidin Kit (130-074-101, Miltenyi) following manufacturer's  
695 instructions and purified using RNeasy MinElute Cleanup kit (Qiagen). The quality of the RNA  
696 was confirmed using the RNA pico Bioanalyser kit (Agilent).

### 697 **4sU RNA sequencing**

698 Up to 1µg purified 4sU-labelled RNA was used to prepare libraries for 4sU-RNA-seq.  
699 Ribosomal RNA was removed using NEBNext® rRNA Depletion Kit and libraries were  
700 prepared using NEBNext® Ultra™ Directional RNA Library Prep Kit for Illumina (NEB)  
701 following manufacturer's instructions. Library quality was assessed using the High-sensitivity  
702 DS DNA Bioanalyser kit (Agilent) and the concentration was measured by quantitative PCR  
703 using KAPA Library quantification standards for Illumina (KAPA Biosystems). All 4sU RNA-

704 seq experiments were carried out in biological triplicates. 4sU RNA-seq libraries were  
705 sequenced as 80 paired-end reads on Illumina NextSeq500 platform using NextSeq® 500/550  
706 High Output Kit v2 (150 cycles).

707

### 708 **Analysis of high throughput sequencing**

709 Sequencing reads were aligned to the mouse genome (mm10) using bowtie2 (Langmead and  
710 Salzberg, 2012) with the “--no-mixed” and “--no-discordant” options. Reads that mapped more  
711 than once to the genome were discarded. For 4sU RNA-seq analysis, rRNA reads were initially  
712 removed by aligning the data to mouse rRNA genomic sequences (GenBank: BK000964.3)  
713 using bowtie2. The rRNA-depleted reads were next aligned against mm10 genome using the  
714 STAR RNA-seq aligner (Dobin et al., 2013). To improve mapping of nascent, intronic  
715 sequences, a second alignment step with bowtie2 was included using the reads which failed to  
716 map using STAR. PCR duplicates were removed using samtools (Li et al., 2009). Biological  
717 replicates were randomly downsampled to the same number of reads for each individual  
718 replicate and merged for visualisation. Bigwig files were generated using MACS2 (Zhang et  
719 al., 2008) and visualised using the using the UCSC Genome Browser (Raney et al., 2014).

720 Peak calling was performed using the MACS2 function with the “-broad” option using the  
721 biological replicates with matched input (Zhang et al., 2008). Peaks mapping to a custom  
722 “blacklist” of artificially high genomic regions were discarded. Only peaks called in both  
723 replicates were considered. Differential analysis of CDK8 binding was done using DiffReps  
724 (Shen et al., 2013) and the called differential regions were overlapped with CDK8 peaks.  
725 Changes in binding of log<sub>2</sub>FC less or more than 0.5 with adjusted p-value below 0.05 were  
726 considered significant.

727 Differential expression analysis was performed using the DESeq2 package (Love et al., 2014),  
728 version 1.6.3, with R version 3.1.1. Counts were quantified using the summarizeOverlaps()  
729 function in R in the mode “Union” and inter.feature=FALSE. Genes with an adjusted p-value  
730 of below 0.1 and a fold change of at least 1.5 were considered differentially expressed.  
731 Statistical analysis was performed using two-sample Wilcoxon rank sum test. Gene ontology  
732 analysis was done using DAVID 6.8 (Huang da et al., 2009). For CDK8 differentially-bound  
733 peaks, all CDK8 peaks were provided as background. For misregulated genes analysis, all  
734 RefSeq genes were provided as background. ATAC peaks were obtained from (King and  
735 Klose, 2017).

736

#### 737 **Accession numbers**

738 ChIP-seq and RNA-seq data from the present study are available to download at GSE98756.  
739 Previously published studies used for analysis include mouse ES cell BioCAP (GSE43512,  
740 (Long et al., 2013b)), Kdm2B ChIP-seq (GSE55698, (Blackledge et al., 2014)), Kdm2A ChIP-  
741 seq (GSE41267, (Farcas et al., 2012)), H3K27me3 ChIP-seq (GSE83135, (Rose et al., 2016)),  
742 H3K4me3 ChIP-seq (GSE93538, (Brown et al., 2017)).

743

#### 744 **Acknowledgments**

745 We would like to thank Anne Turberfield for help with the 4sU-RNAseq protocol and useful  
746 discussion, and Hamish King for assistance with computational analysis and critical comments  
747 and suggestions. We thank David Brown for initiating the FBXL19 experiments, and Anne  
748 Turberfield and Neil Blackledge for critical reading of the manuscript. We would like to thank  
749 Ed Hookway and Udo Oppermann for sequencing support on the NextSeq500 at the Botnar  
750 sequencing facility in Oxford. Work in the Klose laboratory is supported by the Wellcome

751 Trust, the Lister Institute of Preventive Medicine and the European Research Council. T.K. and  
752 H.K. are supported by the AMED-CREST programme from the Japan Agency for Medical  
753 Research and Development. A.F. is supported by a Sir Henry Wellcome Postdoctoral  
754 Fellowship.

755



## 756 **References**

- 757 Adler, A.S., McClelland, M.L., Truong, T., Lau, S., Modrusan, Z., Soukup, T.M., Roose-Girma,  
758 M., Blackwood, E.M., and Firestein, R. (2012). CDK8 maintains tumor dedifferentiation and  
759 embryonic stem cell pluripotency. *Cancer research* 72, 2129-2139.
- 760 Akoulitchev, S., Chuikov, S., and Reinberg, D. (2000). TFIID is negatively regulated by cdk8-  
761 containing mediator complexes. *Nature* 407, 102-106.
- 762 Alarcon, C., Zaromytidou, A.I., Xi, Q., Gao, S., Yu, J., Fujisawa, S., Barlas, A., Miller, A.N.,  
763 Manova-Todorova, K., Macias, M.J., *et al.* (2009). Nuclear CDKs drive Smad transcriptional  
764 activation and turnover in BMP and TGF-beta pathways. *Cell* 139, 757-769.
- 765 Allen, B.L., and Taatjes, D.J. (2015). The Mediator complex: a central integrator of  
766 transcription. *Nature reviews. Molecular cell biology* 16, 155-166.
- 767 Audetat, K.A., Galbraith, M.D., Odell, A.T., Lee, T., Pandey, A., Espinosa, J.M., Dowell, R.D.,  
768 and Taatjes, D.J. (2017). A Kinase-Independent Role for Cyclin-Dependent Kinase 19 in p53  
769 Response. *Molecular and cellular biology* 37.
- 770 Bai, C., Sen, P., Hofmann, K., Ma, L., Goebel, M., Harper, J.W., and Elledge, S.J. (1996). SKP1  
771 connects cell cycle regulators to the ubiquitin proteolysis machinery through a novel motif, the  
772 F-box. *Cell* 86, 263-274.
- 773 Bancerek, J., Poss, Z.C., Steinparzer, I., Sedlyarov, V., Pfaffenwimmer, T., Mikulic, I., Dolken,  
774 L., Strobl, B., Muller, M., Taatjes, D.J., *et al.* (2013). CDK8 kinase phosphorylates  
775 transcription factor STAT1 to selectively regulate the interferon response. *Immunity* 38, 250-  
776 262.
- 777 Belakavadi, M., and Fondell, J.D. (2010). Cyclin-dependent kinase 8 positively cooperates  
778 with Mediator to promote thyroid hormone receptor-dependent transcriptional activation.  
779 *Molecular and cellular biology* 30, 2437-2448.
- 780 Bernstein, B.E., Mikkelsen, T.S., Xie, X., Kamal, M., Huebert, D.J., Cuff, J., Fry, B., Meissner,  
781 A., Wernig, M., Plath, K., *et al.* (2006). A bivalent chromatin structure marks key  
782 developmental genes in embryonic stem cells. *Cell* 125, 315-326.
- 783 Bird, A., Taggart, M., Frommer, M., Miller, O.J., and Macleod, D. (1985). A fraction of the  
784 mouse genome that is derived from islands of nonmethylated, CpG-rich DNA. *Cell* 40, 91-99.
- 785 Black, J.C., Choi, J.E., Lombardo, S.R., and Carey, M. (2006). A mechanism for coordinating  
786 chromatin modification and preinitiation complex assembly. *Molecular cell* 23, 809-818.
- 787 Blackledge, N.P., Farcas, A.M., Kondo, T., King, H.W., McGouran, J.F., Hanssen, L.L., Ito,  
788 S., Cooper, S., Kondo, K., Koseki, Y., *et al.* (2014). Variant PRC1 complex-dependent H2A  
789 ubiquitylation drives PRC2 recruitment and polycomb domain formation. *Cell* 157, 1445-1459.
- 790 Blackledge, N.P., Long, H.K., Zhou, J.C., Kriaucionis, S., Patient, R., and Klose, R.J. (2012).  
791 Bio-CAP: a versatile and highly sensitive technique to purify and characterise regions of non-  
792 methylated DNA. *Nucleic acids research* 40, e32.
- 793 Blackledge, N.P., Thomson, J.P., and Skene, P.J. (2013). CpG island chromatin is shaped by  
794 recruitment of ZF-CxxC proteins. *Cold Spring Harbor perspectives in biology* 5, a018648.
- 795 Blackledge, N.P., Zhou, J.C., Tolstorukov, M.Y., Farcas, A.M., Park, P.J., and Klose, R.J.  
796 (2010). CpG islands recruit a histone H3 lysine 36 demethylase. *Molecular cell* 38, 179-190.

- 797 Blazek, E., Mittler, G., and Meisterernst, M. (2005). The mediator of RNA polymerase II.  
798 *Chromosoma* *113*, 399-408.
- 799 Boyer, L.A., Mathur, D., and Jaenisch, R. (2006). Molecular control of pluripotency. *Current*  
800 *opinion in genetics & development* *16*, 455-462.
- 801 Brown, D.A., Di Cerbo, V., Feldmann, A., Ahn, J., Ito, S., Blackledge, N.P., Nakayama, M.,  
802 McClellan, M., Dimitrova, E., Turberfield, A.H., *et al.* (2017). The SET1 Complex Selects  
803 Actively Transcribed Target Genes via Multivalent Interaction with CpG Island Chromatin.  
804 *Cell Rep* *20*, 2313-2327.
- 805 Carrozza, M.J., Li, B., Florens, L., Suganuma, T., Swanson, S.K., Lee, K.K., Shia, W.J.,  
806 Anderson, S., Yates, J., Washburn, M.P., *et al.* (2005). Histone H3 methylation by Set2 directs  
807 deacetylation of coding regions by Rpd3S to suppress spurious intragenic transcription. *Cell*  
808 *123*, 581-592.
- 809 Chi, Y., Huddleston, M.J., Zhang, X., Young, R.A., Annan, R.S., Carr, S.A., and Deshaies,  
810 R.J. (2001). Negative regulation of Gcn4 and Msn2 transcription factors by Srb10 cyclin-  
811 dependent kinase. *Genes & development* *15*, 1078-1092.
- 812 D'Urso, A., Takahashi, Y.H., Xiong, B., Marone, J., Coukos, R., Randise-Hinchliff, C., Wang,  
813 J.P., Shilatifard, A., and Brickner, J.H. (2016). Set1/COMPASS and Mediator are repurposed  
814 to promote epigenetic transcriptional memory. *eLife* *5*.
- 815 Davis, M.A., Larimore, E.A., Fissel, B.M., Swanger, J., Taatjes, D.J., and Clurman, B.E.  
816 (2013). The SCF-Fbw7 ubiquitin ligase degrades MED13 and MED13L and regulates CDK8  
817 module association with Mediator. *Genes & development* *27*, 151-156.
- 818 Dobin, A., Davis, C.A., Schlesinger, F., Drenkow, J., Zaleski, C., Jha, S., Batut, P., Chaisson,  
819 M., and Gingeras, T.R. (2013). STAR: ultrafast universal RNA-seq aligner. *Bioinformatics* *29*,  
820 15-21.
- 821 Dong, S., Zhao, J., Wei, J., Bowser, R.K., Khoo, A., Liu, Z., Luketich, J.D., Pennathur, A., Ma,  
822 H., and Zhao, Y. (2014). F-box protein complex FBXL19 regulates TGFbeta1-induced E-  
823 cadherin down-regulation by mediating Rac3 ubiquitination and degradation. *Molecular cancer*  
824 *13*, 76.
- 825 Donner, A.J., Ebmeier, C.C., Taatjes, D.J., and Espinosa, J.M. (2010). CDK8 is a positive  
826 regulator of transcriptional elongation within the serum response network. *Nature structural &*  
827 *molecular biology* *17*, 194-201.
- 828 Donner, A.J., Szostek, S., Hoover, J.M., and Espinosa, J.M. (2007). CDK8 is a stimulus-  
829 specific positive coregulator of p53 target genes. *Molecular cell* *27*, 121-133.
- 830 Elmlund, H., Baraznenok, V., Lindahl, M., Samuelson, C.O., Koeck, P.J., Holmberg, S.,  
831 Hebert, H., and Gustafsson, C.M. (2006). The cyclin-dependent kinase 8 module sterically  
832 blocks Mediator interactions with RNA polymerase II. *Proc Natl Acad Sci U S A* *103*, 15788-  
833 15793.
- 834 Farcas, A.M., Blackledge, N.P., Sudbery, I., Long, H.K., McGouran, J.F., Rose, N.R., Lee, S.,  
835 Sims, D., Cerase, A., Sheahan, T.W., *et al.* (2012). KDM2B links the Polycomb Repressive  
836 Complex 1 (PRC1) to recognition of CpG islands. *eLife* *1*, e00205.
- 837 Firestein, R., Bass, A.J., Kim, S.Y., Dunn, I.F., Silver, S.J., Guney, I., Freed, E., Ligon, A.H.,  
838 Vena, N., Ogino, S., *et al.* (2008). CDK8 is a colorectal cancer oncogene that regulates beta-  
839 catenin activity. *Nature* *455*, 547-551.

- 840 Fondell, J.D., Ge, H., and Roeder, R.G. (1996). Ligand induction of a transcriptionally active  
841 thyroid hormone receptor coactivator complex. *Proc Natl Acad Sci U S A* *93*, 8329-8333.
- 842 Fryer, C.J., White, J.B., and Jones, K.A. (2004). Mastermind recruits CycC:CDK8 to  
843 phosphorylate the Notch ICD and coordinate activation with turnover. *Molecular cell* *16*, 509-  
844 520.
- 845 Galbraith, M.D., Allen, M.A., Bensard, C.L., Wang, X., Schwinn, M.K., Qin, B., Long, H.W.,  
846 Daniels, D.L., Hahn, W.C., Dowell, R.D., *et al.* (2013). HIF1A employs CDK8-mediator to  
847 stimulate RNAPII elongation in response to hypoxia. *Cell* *153*, 1327-1339.
- 848 He, J., Kallin, E.M., Tsukada, Y., and Zhang, Y. (2008). The H3K36 demethylase  
849 Jhdm1b/Kdm2b regulates cell proliferation and senescence through p15(Ink4b). *Nature*  
850 *structural & molecular biology* *15*, 1169-1175.
- 851 He, J., Shen, L., Wan, M., Taranova, O., Wu, H., and Zhang, Y. (2013). Kdm2b maintains  
852 murine embryonic stem cell status by recruiting PRC1 complex to CpG islands of  
853 developmental genes. *Nature cell biology* *15*, 373-384.
- 854 Hengartner, C.J., Myer, V.E., Liao, S.M., Wilson, C.J., Koh, S.S., and Young, R.A. (1998).  
855 Temporal regulation of RNA polymerase II by Srb10 and Kin28 cyclin-dependent kinases.  
856 *Molecular cell* *2*, 43-53.
- 857 Huang da, W., Sherman, B.T., and Lempicki, R.A. (2009). Systematic and integrative analysis  
858 of large gene lists using DAVID bioinformatics resources. *Nature protocols* *4*, 44-57.
- 859 Illingworth, R.S., and Bird, A.P. (2009). CpG islands--'a rough guide'. *FEBS letters* *583*, 1713-  
860 1720.
- 861 Jeronimo, C., Langelier, M.F., Bataille, A.R., Pascal, J.M., Pugh, B.F., and Robert, F. (2016).  
862 Tail and Kinase Modules Differently Regulate Core Mediator Recruitment and Function In  
863 Vivo. *Molecular cell* *64*, 455-466.
- 864 Kagey, M.H., Newman, J.J., Bilodeau, S., Zhan, Y., Orlando, D.A., van Berkum, N.L.,  
865 Ebmeier, C.C., Goossens, J., Rahl, P.B., Levine, S.S., *et al.* (2010). Mediator and cohesin  
866 connect gene expression and chromatin architecture. *Nature* *467*, 430-435.
- 867 Katoh, M., and Katoh, M. (2004). Identification and characterization of FBXL19 gene in silico.  
868 *International journal of molecular medicine* *14*, 1109-1114.
- 869 Keogh, M.C., Kurdistani, S.K., Morris, S.A., Ahn, S.H., Podolny, V., Collins, S.R., Schuldiner,  
870 M., Chin, K., Punna, T., Thompson, N.J., *et al.* (2005). Cotranscriptional set2 methylation of  
871 histone H3 lysine 36 recruits a repressive Rpd3 complex. *Cell* *123*, 593-605.
- 872 King, H.W., and Klose, R.J. (2017). The pioneer factor OCT4 requires the chromatin  
873 remodeller BRG1 to support gene regulatory element function in mouse embryonic stem cells.  
874 *eLife* *6*.
- 875 Klose, R.J., and Bird, A.P. (2006). Genomic DNA methylation: the mark and its mediators.  
876 *Trends in biochemical sciences* *31*, 89-97.
- 877 Klose, R.J., Cooper, S., Farcas, A.M., Blackledge, N.P., and Brockdorff, N. (2013). Chromatin  
878 sampling--an emerging perspective on targeting polycomb repressor proteins. *PLoS genetics*  
879 *9*, e1003717.
- 880 Knuesel, M.T., Meyer, K.D., Bernecky, C., and Taatjes, D.J. (2009). The human CDK8  
881 subcomplex is a molecular switch that controls Mediator coactivator function. *Genes &*  
882 *development* *23*, 439-451.

- 883 Langmead, B., and Salzberg, S.L. (2012). Fast gapped-read alignment with Bowtie 2. *Nat*  
884 *Methods* *9*, 357-359.
- 885 Larsen, F., Gundersen, G., Lopez, R., and Prydz, H. (1992). CpG islands as gene markers in  
886 the human genome. *Genomics* *13*, 1095-1107.
- 887 Lee, B.K., Lee, J., Shen, W., Rhee, C., Chung, H., and Kim, J. (2017). Fbxl19 recruitment to  
888 CpG islands is required for Rnf20-mediated H2B mono-ubiquitination. *Nucleic acids research*.
- 889 Lee, J.H., Voo, K.S., and Skalnik, D.G. (2001). Identification and characterization of the DNA  
890 binding domain of CpG-binding protein. *The Journal of biological chemistry* *276*, 44669-  
891 44676.
- 892 Li, H., Handsaker, B., Wysoker, A., Fennell, T., Ruan, J., Homer, N., Marth, G., Abecasis, G.,  
893 Durbin, R., and Genome Project Data Processing, S. (2009). The Sequence Alignment/Map  
894 format and SAMtools. *Bioinformatics* *25*, 2078-2079.
- 895 Liu, Y., Ranish, J.A., Aebersold, R., and Hahn, S. (2001). Yeast nuclear extract contains two  
896 major forms of RNA polymerase II mediator complexes. *The Journal of biological chemistry*  
897 *276*, 7169-7175.
- 898 Long, H.K., Blackledge, N.P., and Klose, R.J. (2013a). ZF-CxxC domain-containing proteins,  
899 CpG islands and the chromatin connection. *Biochemical Society transactions* *41*, 727-740.
- 900 Long, H.K., Sims, D., Heger, A., Blackledge, N.P., Kutter, C., Wright, M.L., Grutzner, F.,  
901 Odom, D.T., Patient, R., Ponting, C.P., *et al.* (2013b). Epigenetic conservation at gene  
902 regulatory elements revealed by non-methylated DNA profiling in seven vertebrates. *eLife* *2*,  
903 e00348.
- 904 Love, M.I., Huber, W., and Anders, S. (2014). Moderated estimation of fold change and  
905 dispersion for RNA-seq data with DESeq2. *Genome Biol* *15*, 550.
- 906 Malik, S., and Roeder, R.G. (2010). The metazoan Mediator co-activator complex as an  
907 integrative hub for transcriptional regulation. *Nat Rev Genet* *11*, 761-772.
- 908 Mikkelsen, T.S., Ku, M., Jaffe, D.B., Issac, B., Lieberman, E., Giannoukos, G., Alvarez, P.,  
909 Brockman, W., Kim, T.K., Koche, R.P., *et al.* (2007). Genome-wide maps of chromatin state  
910 in pluripotent and lineage-committed cells. *Nature* *448*, 553-560.
- 911 Mittler, G., Kremmer, E., Timmers, H.T., and Meisterernst, M. (2001). Novel critical role of a  
912 human Mediator complex for basal RNA polymerase II transcription. *EMBO Rep* *2*, 808-813.
- 913 Morris, E.J., Ji, J.Y., Yang, F., Di Stefano, L., Herr, A., Moon, N.S., Kwon, E.J., Haigis, K.M.,  
914 Naar, A.M., and Dyson, N.J. (2008). E2F1 represses beta-catenin transcription and is  
915 antagonized by both pRB and CDK8. *Nature* *455*, 552-556.
- 916 Naar, A.M., Taatjes, D.J., Zhai, W., Nogales, E., and Tjian, R. (2002). Human CRSP interacts  
917 with RNA polymerase II CTD and adopts a specific CTD-bound conformation. *Genes &*  
918 *development* *16*, 1339-1344.
- 919 Paoletti, A.C., Parmely, T.J., Tomomori-Sato, C., Sato, S., Zhu, D., Conaway, R.C., Conaway,  
920 J.W., Florens, L., and Washburn, M.P. (2006). Quantitative proteomic analysis of distinct  
921 mammalian Mediator complexes using normalized spectral abundance factors. *Proc Natl Acad*  
922 *Sci U S A* *103*, 18928-18933.
- 923 Pavri, R., Lewis, B., Kim, T.K., Dilworth, F.J., Erdjument-Bromage, H., Tempst, P., de Murcia,  
924 G., Evans, R., Chambon, P., and Reinberg, D. (2005). PARP-1 determines specificity in a  
925 retinoid signaling pathway via direct modulation of mediator. *Molecular cell* *18*, 83-96.

- 926 Peters, A.H., Kubicek, S., Mechtler, K., O'Sullivan, R.J., Derijck, A.A., Perez-Burgos, L.,  
927 Kohlmaier, A., Opravil, S., Tachibana, M., Shinkai, Y., *et al.* (2003). Partitioning and plasticity  
928 of repressive histone methylation states in mammalian chromatin. *Molecular cell* *12*, 1577-  
929 1589.
- 930 Petrenko, N., Jin, Y., Wong, K.H., and Struhl, K. (2016). Mediator Undergoes a Compositional  
931 Change during Transcriptional Activation. *Molecular cell* *64*, 443-454.
- 932 Poss, Z.C., Ebmeier, C.C., and Taatjes, D.J. (2013). The Mediator complex and transcription  
933 regulation. *Crit Rev Biochem Mol Biol* *48*, 575-608.
- 934 Ran, F.A., Hsu, P.D., Wright, J., Agarwala, V., Scott, D.A., and Zhang, F. (2013). Genome  
935 engineering using the CRISPR-Cas9 system. *Nature protocols* *8*, 2281-2308.
- 936 Raney, B.J., Dreszer, T.R., Barber, G.P., Clawson, H., Fujita, P.A., Wang, T., Nguyen, N.,  
937 Paten, B., Zweig, A.S., Karolchik, D., *et al.* (2014). Track data hubs enable visualization of  
938 user-defined genome-wide annotations on the UCSC Genome Browser. *Bioinformatics* *30*,  
939 1003-1005.
- 940 Rose, N.R., King, H.W., Blackledge, N.P., Fursova, N.A., Ember, K.J., Fischer, R., Kessler,  
941 B.M., and Klose, R.J. (2016). RYBP stimulates PRC1 to shape chromatin-based  
942 communication between Polycomb repressive complexes. *eLife* *5*.
- 943 Sato, S., Tomomori-Sato, C., Parmely, T.J., Florens, L., Zybaylov, B., Swanson, S.K., Banks,  
944 C.A., Jin, J., Cai, Y., Washburn, M.P., *et al.* (2004). A set of consensus mammalian mediator  
945 subunits identified by multidimensional protein identification technology. *Molecular cell* *14*,  
946 685-691.
- 947 Schubeler, D. (2015). Function and information content of DNA methylation. *Nature* *517*, 321-  
948 326.
- 949 Shen, L., Shao, N.Y., Liu, X., Maze, I., Feng, J., and Nestler, E.J. (2013). diffReps: detecting  
950 differential chromatin modification sites from ChIP-seq data with biological replicates. *PLoS*  
951 *One* *8*, e65598.
- 952 Skaar, J.R., Pagan, J.K., and Pagano, M. (2014). SCF ubiquitin ligase-targeted therapies. *Nat*  
953 *Rev Drug Discov* *13*, 889-903.
- 954 Skowyra, D., Craig, K.L., Tyers, M., Elledge, S.J., and Harper, J.W. (1997). F-box proteins are  
955 receptors that recruit phosphorylated substrates to the SCF ubiquitin-ligase complex. *Cell* *91*,  
956 209-219.
- 957 Spitz, F., and Furlong, E.E. (2012). Transcription factors: from enhancer binding to  
958 developmental control. *Nat Rev Genet* *13*, 613-626.
- 959 Taatjes, D.J., Naar, A.M., Andel, F., 3rd, Nogales, E., and Tjian, R. (2002). Structure, function,  
960 and activator-induced conformations of the CRSP coactivator. *Science* *295*, 1058-1062.
- 961 Takahashi, H., Parmely, T.J., Sato, S., Tomomori-Sato, C., Banks, C.A., Kong, S.E., Szutorisz,  
962 H., Swanson, S.K., Martin-Brown, S., Washburn, M.P., *et al.* (2011). Human mediator subunit  
963 MED26 functions as a docking site for transcription elongation factors. *Cell* *146*, 92-104.
- 964 Tan, M.K., Lim, H.J., Bennett, E.J., Shi, Y., and Harper, J.W. (2013). Parallel SCF adaptor  
965 capture proteomics reveals a role for SCFFBXL17 in NRF2 activation via BACH1 repressor  
966 turnover. *Molecular cell* *52*, 9-24.



- 967 Thomson, J.P., Skene, P.J., Selfridge, J., Clouaire, T., Guy, J., Webb, S., Kerr, A.R., Deaton,  
968 A., Andrews, R., James, K.D., *et al.* (2010). CpG islands influence chromatin structure via the  
969 CpG-binding protein Cfp1. *Nature* *464*, 1082-1086.
- 970 Tsai, K.L., Sato, S., Tomomori-Sato, C., Conaway, R.C., Conaway, J.W., and Asturias, F.J.  
971 (2013). A conserved Mediator-CDK8 kinase module association regulates Mediator-RNA  
972 polymerase II interaction. *Nature structural & molecular biology* *20*, 611-619.
- 973 Tsukada, Y., Fang, J., Erdjument-Bromage, H., Warren, M.E., Borchers, C.H., Tempst, P., and  
974 Zhang, Y. (2006). Histone demethylation by a family of JmjC domain-containing proteins.  
975 *Nature* *439*, 811-816.
- 976 Voo, K.S., Carlone, D.L., Jacobsen, B.M., Flodin, A., and Skalnik, D.G. (2000). Cloning of a  
977 mammalian transcriptional activator that binds unmethylated CpG motifs and shares a CXXC  
978 domain with DNA methyltransferase, human trithorax, and methyl-CpG binding domain  
979 protein 1. *Molecular and cellular biology* *20*, 2108-2121.
- 980 Wei, J., Mialki, R.K., Dong, S., Khoo, A., Mallampalli, R.K., Zhao, Y., and Zhao, J. (2013). A  
981 new mechanism of RhoA ubiquitination and degradation: roles of SCF(FBXL19) E3 ligase and  
982 Erk2. *Biochimica et biophysica acta* *1833*, 2757-2764.
- 983 Whyte, W.A., Orlando, D.A., Hnisz, D., Abraham, B.J., Lin, C.Y., Kagey, M.H., Rahl, P.B.,  
984 Lee, T.I., and Young, R.A. (2013). Master transcription factors and mediator establish super-  
985 enhancers at key cell identity genes. *Cell* *153*, 307-319.
- 986 Wojcik, C., Tanaka, K., Paweletz, N., Naab, U., and Wilk, S. (1998). Proteasome activator  
987 (PA28) subunits, alpha, beta and gamma (Ki antigen) in NT2 neuronal precursor cells and  
988 HeLa S3 cells. *European journal of cell biology* *77*, 151-160.
- 989 Wu, X., Johansen, J.V., and Helin, K. (2013). Fbxl10/Kdm2b recruits polycomb repressive  
990 complex 1 to CpG islands and regulates H2A ubiquitylation. *Molecular cell* *49*, 1134-1146.
- 991 Zhang, Y., Liu, T., Meyer, C.A., Eeckhoute, J., Johnson, D.S., Bernstein, B.E., Nusbaum, C.,  
992 Myers, R.M., Brown, M., Li, W., *et al.* (2008). Model-based analysis of ChIP-Seq (MACS).  
993 *Genome Biol* *9*, R137.
- 994 Zhao, J., Mialki, R.K., Wei, J., Coon, T.A., Zou, C., Chen, B.B., Mallampalli, R.K., and Zhao,  
995 Y. (2013). SCF E3 ligase F-box protein complex SCF(FBXL19) regulates cell migration by  
996 mediating Rac1 ubiquitination and degradation. *FASEB journal : official publication of the*  
997 *Federation of American Societies for Experimental Biology* *27*, 2611-2619.
- 998 Zhao, J., Wei, J., Mialki, R.K., Mallampalli, D.F., Chen, B.B., Coon, T., Zou, C., Mallampalli,  
999 R.K., and Zhao, Y. (2012). F-box protein FBXL19-mediated ubiquitination and degradation of  
1000 the receptor for IL-33 limits pulmonary inflammation. *Nature immunology* *13*, 651-658.

1001

Dimitrova et al., Figure 1.

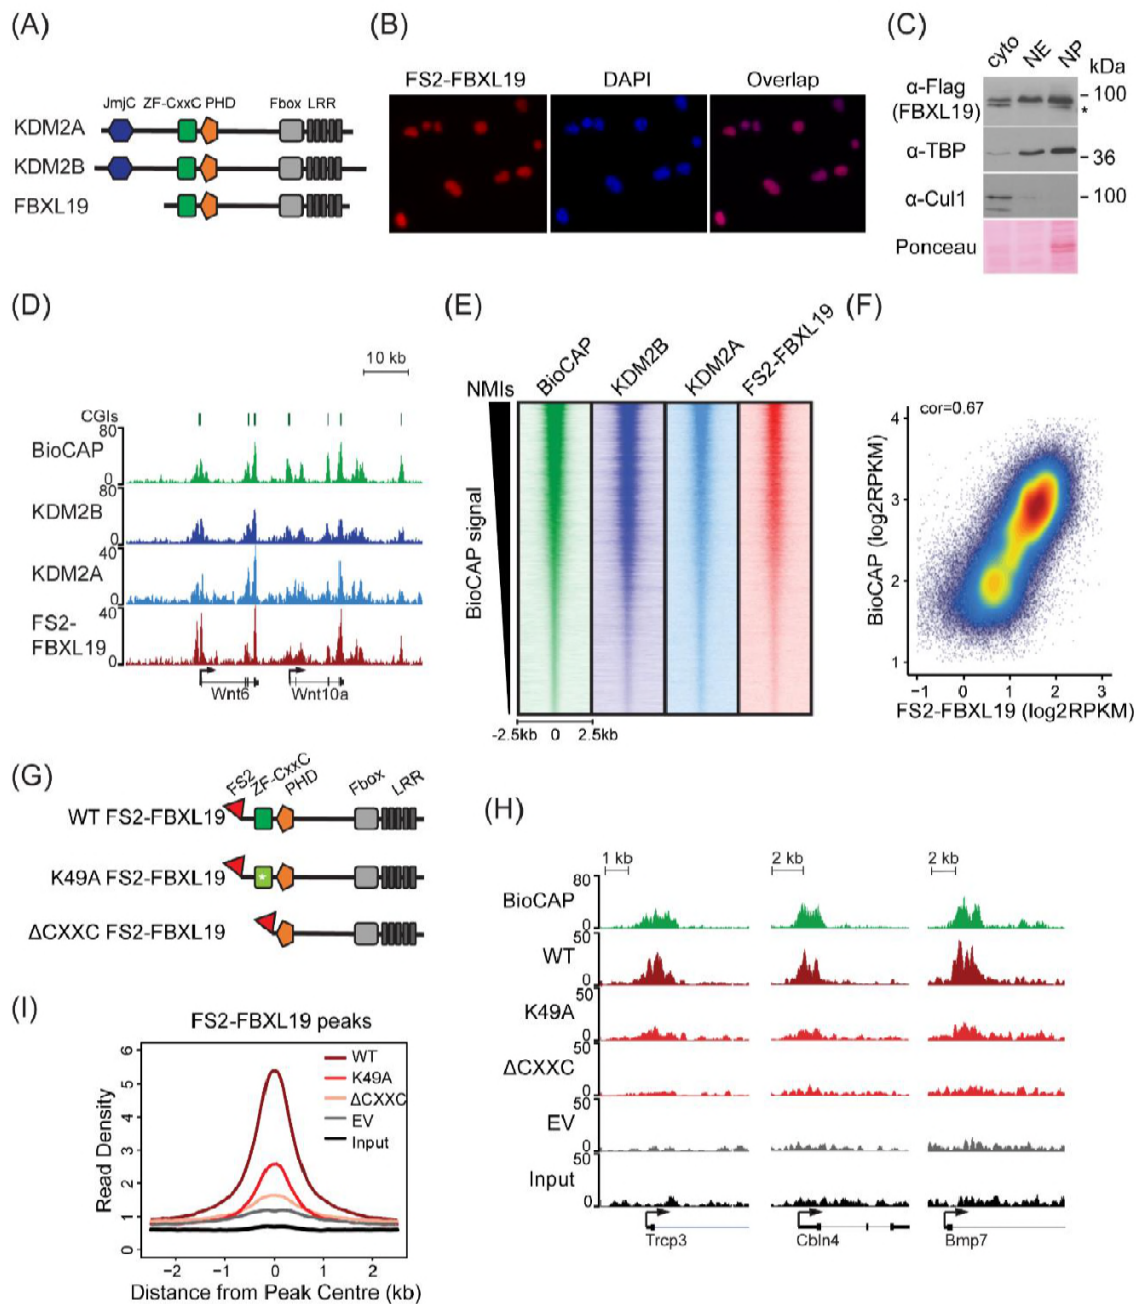

1002

1003 **Figure 1: FBXL19 binds CpG islands genome-wide via its ZF-CxxC domain.**

1004 (A) A schematic illustrating KDM2 protein domain architecture.

1005 (B) Immuno-fluorescent staining for FS2-FBXL19 in ES cells.

1006 (C) ES cell fractionation and Western blot for factors enriched in the nucleus (TBP), the  
 1007 cytoplasm (CUL1), and FS2-FBXL19. Ponceau S staining indicates protein loading. Cyto –  
 1008 cytoplasmic fraction, NE – soluble nuclear extract, NP – insoluble nuclear pellet. The asterisk  
 1009 indicates a non-specific band.

1010 (D) Screen shots showing ChIP-seq traces for KDM2B, KDM2A and FS2-FBXL19. BioCAP  
1011 is included to indicate the location of non-methylated islands (NMIs) and computationally  
1012 predicted CGIs are illustrated above.

1013 (E) Heatmaps showing enrichment of KDM2 proteins over a 5kb region centred on NMIs  
1014 (n=27698), sorted by decreasing BioCAP signal. BioCAP is shown for comparison.

1015 (F) A scatter plot showing the Spearman correlation between FS2-FBXL19 ChIP-seq signal  
1016 and BioCAP signal at NMIs.

1017 (G) A schematic illustrating the FS2-FBXL19 transgenes.

1018 (H) A screen shot showing ChIP-seq traces for WT FS2-FBXL19 and ZF-CxxC FS2-FBXL19  
1019 mutants as in G. EV indicates empty vector control.

1020 (I) A metaplot analysis of WT FS2-FBXL19 and ZF-CxxC FS2-FBXL19 mutants over  
1021 FBXL19 peaks.

1022



Dimitrova et al., Figure 2.

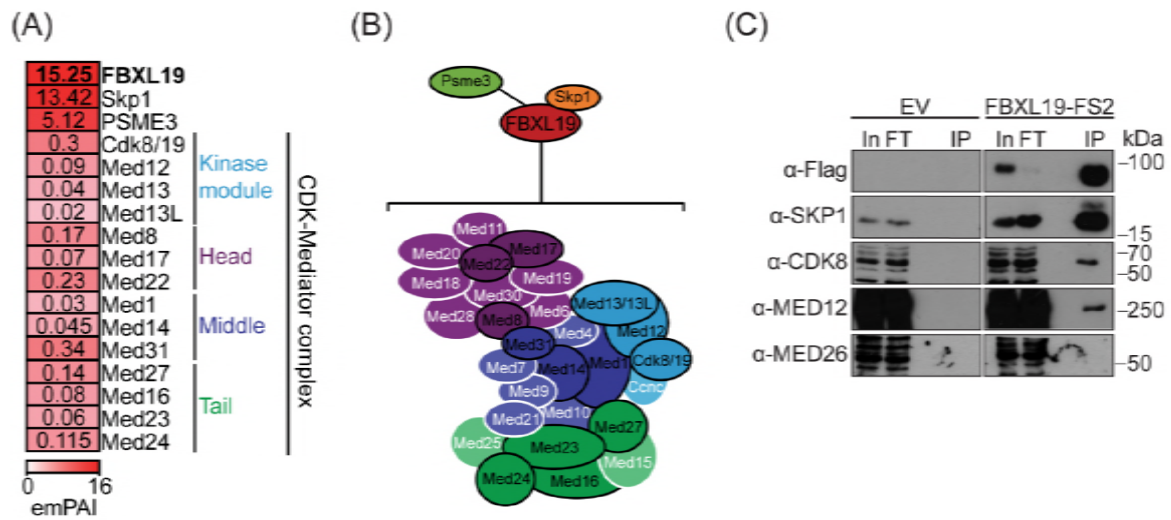

1023

1024 **Figure 2: FBXL19 interacts with CDK-Mediator complex in ES cells.**

1025 (A) A heatmap representing the empirically modified protein abundance index (emPAI) of  
 1026 identified FBXL19-interacting proteins by affinity purification mass spectrometry (AP-MS).  
 1027 Data shown is an average of two biological replicates. The location of the identified Mediator  
 1028 components within the holocomplex is summarised on the right and in (B).

1029 (B) A schematic representation of the identified FBXL19-interacting proteins. Subunits of the  
 1030 CDK-Mediator complex not identified by AP-MS are shown in white.

1031 (C) Western blot analysis of FS2-FBXL19 and control purifications (EV) probed with the  
 1032 indicated antibodies.

1033

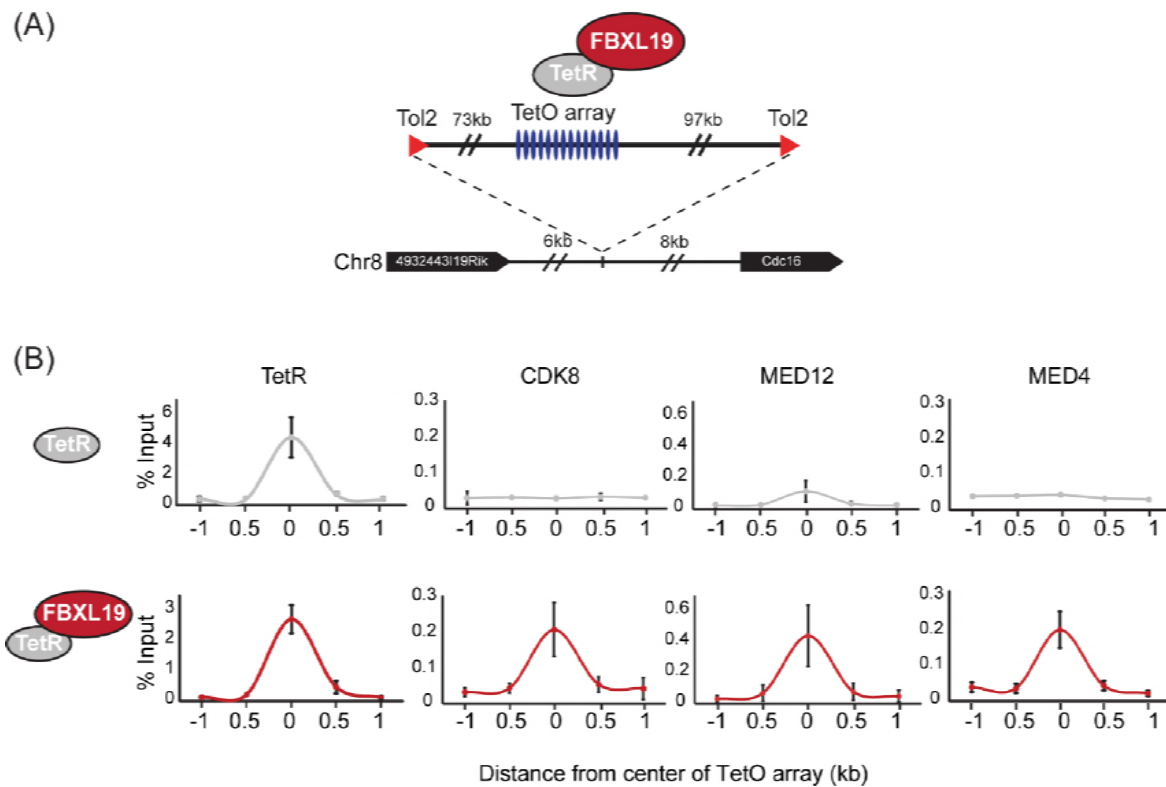

1034

1035 **Figure 3: FBXL19 recruits CDK-Mediator to chromatin.**

1036 (A) A schematic representation of the integration site of the TetO array.

1037 (B) ChIP-qPCR analysis of the binding of the indicated proteins across the TetO array in TetR  
1038 only (top) and TetR-FBXL19 (bottom) ES cell lines. The x-axis indicates the spatial  
1039 arrangement of the qPCR amplicons with respect to the center of the TetO array (in kb). Error  
1040 bars represent SEM of three biological replicates.

1041

Dimitrova et al. Figure 4.

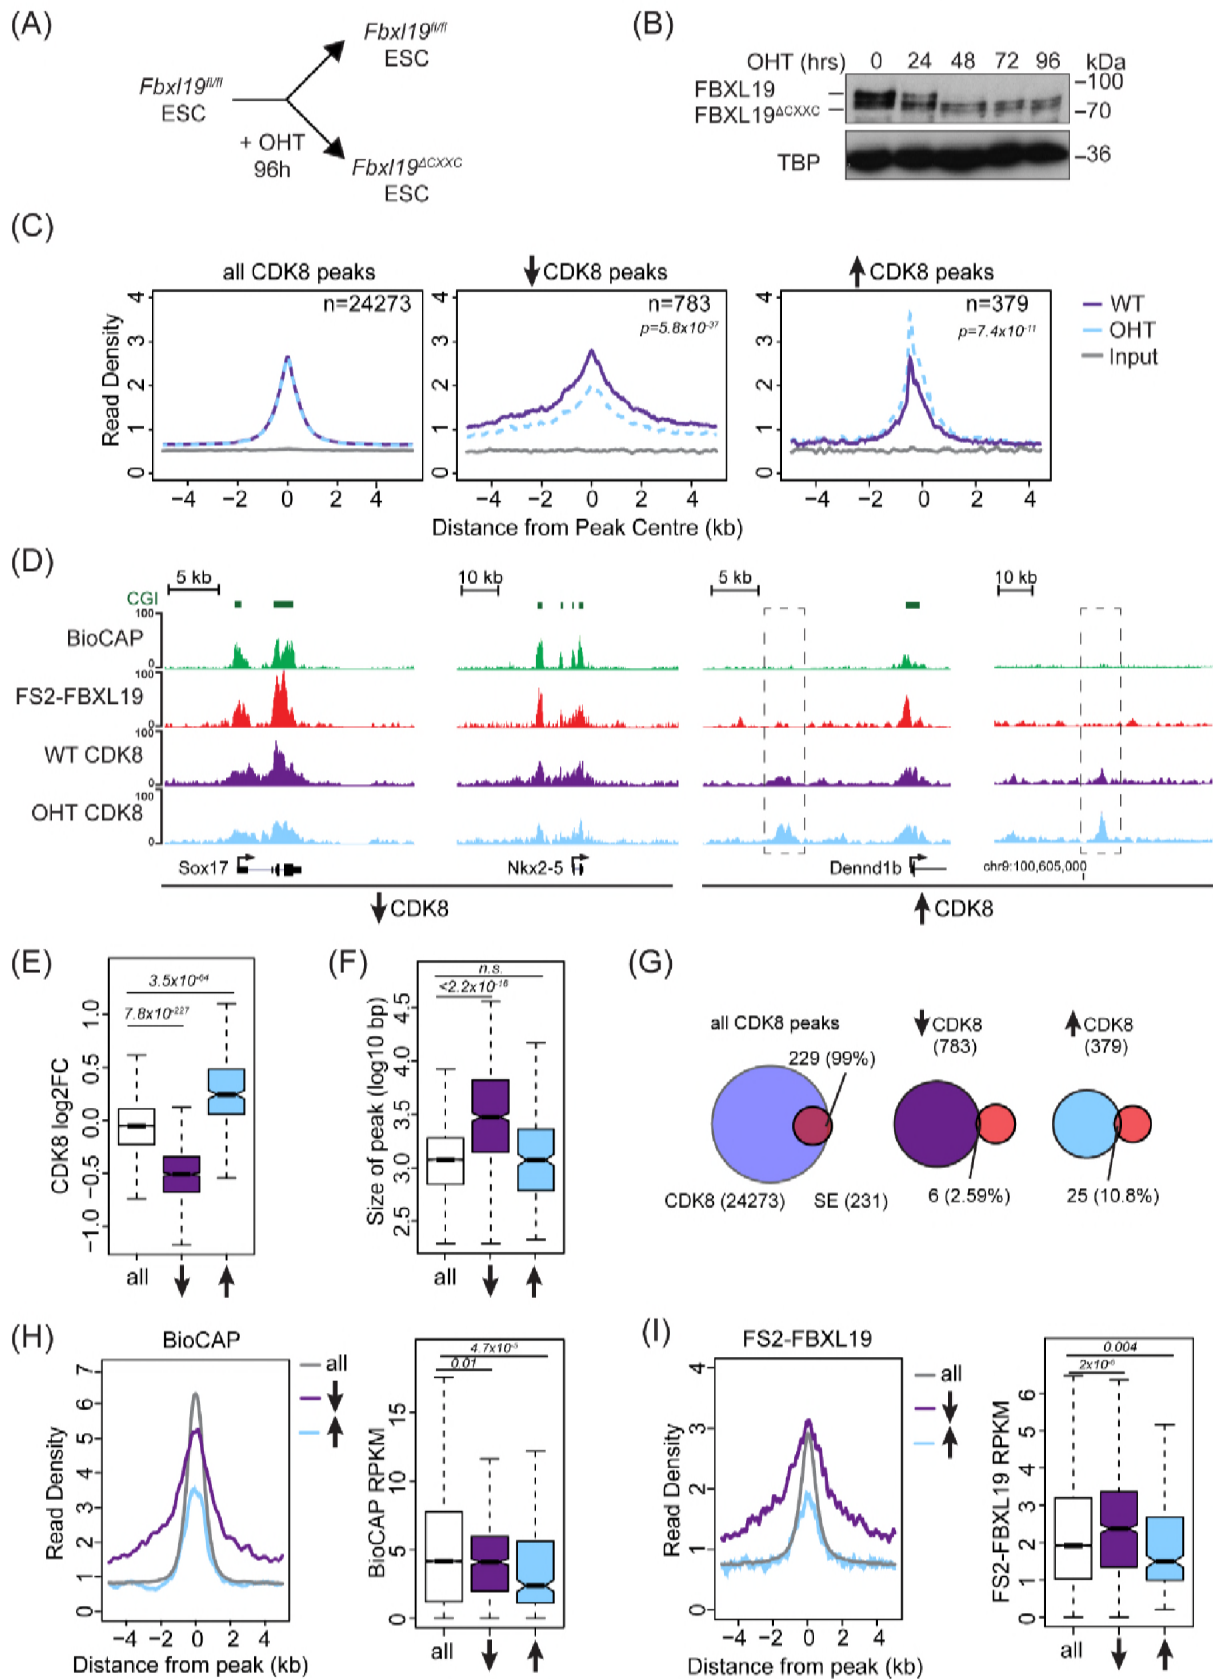

1042

1043 **Figure 4: FBXL19 is required for appropriate CDK8 occupancy at a subset of CpG island**  
1044 **promoters.**

1045 (A) A schematic illustrating how addition of OHT (4-hydroxytamoxifen) leads to the  
1046 generation of *Fbxl19<sup>ACXXC</sup>* ES cells.

1047 (B) Western blot analysis of an OHT-treatment time course in the *Fbxl19<sup>fl/fl</sup>* ES cell line. Hours  
1048 of treatment are shown. FBXL19 protein was C-terminally tagged with a T7 epitope (Figure  
1049 S2B and S2C) to allow for Western blot detection with an anti-T7 antibody. TBP was probed  
1050 as a loading control.

1051 (C) Metaplots showing CDK8 enrichment in *Fbxl19<sup>fl/fl</sup>* ES cells (WT) and *Fbxl19<sup>ACXXC</sup>* ES cells  
1052 (OHT) at all CDK8 peaks (left), peaks showing decreased CDK8 occupancy ( $\uparrow$ , middle) and  
1053 peaks showing increased CDK8 occupancy ( $\downarrow$ , right). The number of total peaks in each group  
1054 is indicated. p-values denote statistical significance calculated by Wilcoxon rank sum test  
1055 comparing ChIP-seq read counts between WT and OHT samples across a 1.5-kbp interval  
1056 flanking the center of CDK8 peaks.

1057 (D) Screen shots showing ChIP-seq traces for CDK8 in wild type *Fbxl19<sup>fl/fl</sup>* ES cells (WT) and  
1058 *Fbxl19<sup>ACXXC</sup>* ES cells (OHT). BioCAP and FS2-FBXL19 tracks are given for comparison. Left  
1059 – CDK8 peaks showing reduced CDK8 binding in *Fbxl19<sup>ACXXC</sup>* ES cells; Right – CDK8 peaks  
1060 showing increased CDK8 binding in *Fbxl19<sup>ACXXC</sup>* ES cells (indicated with rectangles).

1061 (E) Boxplots showing log<sub>2</sub> fold change (log<sub>2</sub>FC) of CDK8 ChIP-seq signal (RPKM) at all  
1062 CDK8 peaks (n=24273), and those with reduced CDK8 (n=783,  $\downarrow$ ) and increased CDK8  
1063 (n=379,  $\uparrow$ ). p-values were calculated using a Wilcoxon rank sum test.

1064 (F) Boxplots showing size of CDK8 peaks as in (E). p-values were calculated using a Wilcoxon  
1065 rank sum test.

1066 (G) Venn diagrams representing the overlap between CDK8 peaks and super enhancers (SE)  
1067 at CDK8 peaks as in (E). Percent overlap of all SEs is indicated.

1068 (H) A metaplot (left) showing BioCAP enrichment at CDK8 peaks as in (E) and boxplot  
1069 quantification (right) of BioCAP RPKM levels. p-values calculated using Wilcoxon rank sum  
1070 test are indicated.

1071 (I) A metaplot (left) showing FS2-FBXL19 enrichment at CDK8 peaks as in (E) and boxplot  
1072 quantification (right) of FS2-FBXL19 RPKM levels. p-values calculated using Wilcoxon rank  
1073 sum test are indicated.

1074

1075

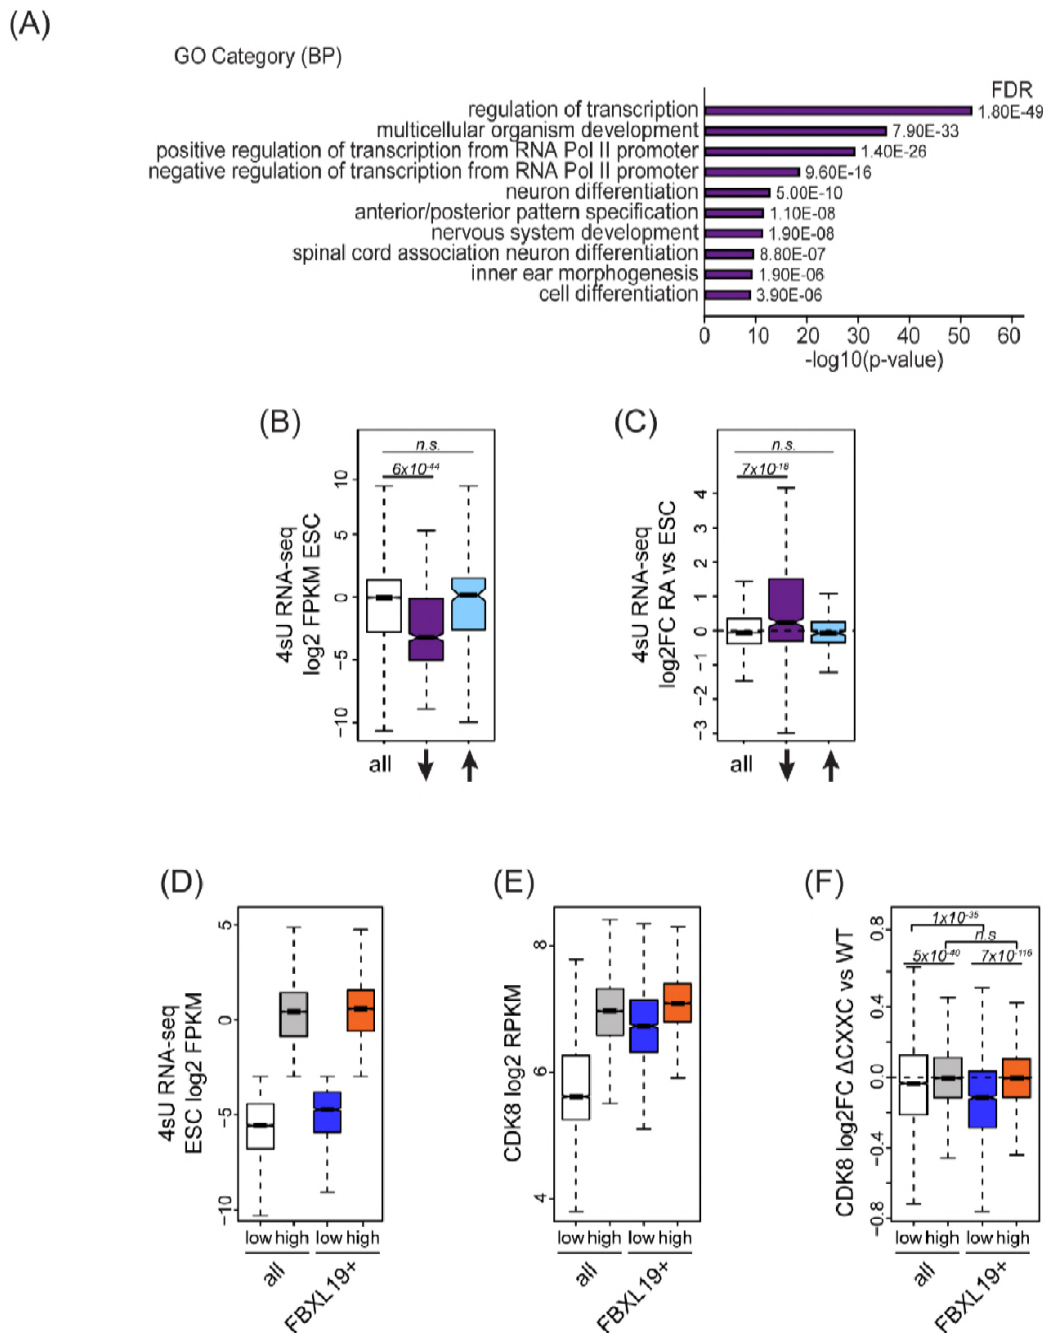

1076

1077 **Figure 5. FBXL19 targets CDK8 to promoters of silent developmental genes in ES cells.**

1078 (A) Gene ontology analysis of genes associated with a decrease in CDK8 binding.

1079 (B) A boxplot showing expression levels (log<sub>2</sub>FPKM) of CDK8-bound genes in wild type ES  
 1080 cells. Genes are divided based on CDK8 binding in *Fbxl19*<sup>ΔCXXC</sup> ES cells as in Figure 4E. p-  
 1081 values were calculated using a Wilcoxon rank sum test.

1082 (C) A boxplot showing the change in gene expression (log<sub>2</sub> fold change) observed by 4sU  
1083 RNA-seq of CDK8-bound genes (as in Figure 4E) following RA treatment. p-values were  
1084 calculated using a Wilcoxon rank sum test.

1085 (D) A boxplot comparing gene expression levels (log<sub>2</sub>FPKM) of all (n=19310) and FBXL19-  
1086 bound (FBXL19+, n=11368) genes separated by low (all genes n=7417; FBXL19+ genes  
1087 n=2031) and high expression levels (all genes n=11893, FBXL19+ genes n=9337) in ES cells  
1088 (based on Figure S5B).

1089 (E) A boxplot showing CDK8 enrichment at all and FBXL19-bound genes separated by  
1090 expression level as in (D).

1091 (F) A boxplot showing change in CDK8 binding at the TSSs of all and FBXL19-bound genes  
1092 divided by expression level as in (D). p-values were calculated using a Wilcoxon rank sum test.

1093



Dimitrova et al. Figure 6.

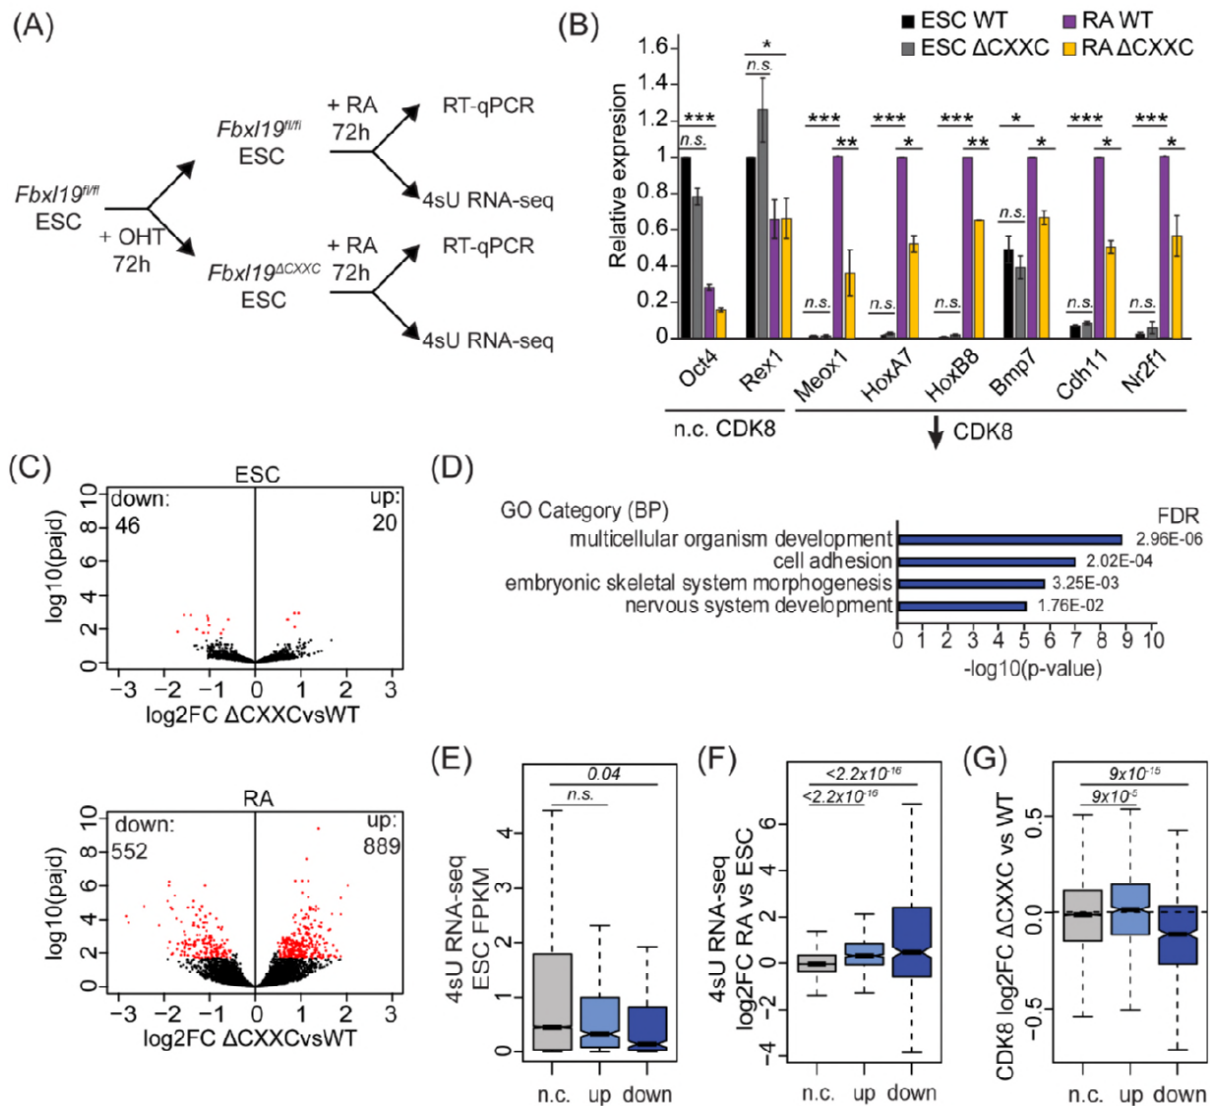

1094

1095 **Figure 6: Removing the CpG island-binding domain of FBXL19 results in a failure to**  
 1096 **induce developmental genes during ES cell differentiation.**

1097 (A) A schematic illustrating the OHT treatment and differentiation approach.

1098 (B) RT-qPCR gene expression analysis of genes showing decreased CDK8 binding in  
 1099 *Fbxl19<sup>ΔCXXC</sup>* ES cells before (ESC) and after RA induction. Expression is relative to the average  
 1100 of two house-keeping genes. Error bars show SEM of three biological replicates, asterisk  
 1101 represent statistical significance calculated by Student T-test: \* p<0.05, \*\* p<0.01, \*\*\*  
 1102 p<0.001.

1103 (C) Volcano plots showing differential expression (log<sub>2</sub> fold change) comparing WT and  
 1104 *Fbxl19<sup>ΔCXXC</sup>* cells in the ES cell (top) and RA-induced state (bottom). Differentially expressed

1105 genes ( $\log_2FC < -0.5$  or  $\log_2FC > 0.5$ ,  $p_{adj} < 0.1$ ) are shown in red. The number of genes  
1106 considered to be significantly altered in expression are indicated.

1107 (D) Gene ontology analysis of genes with decreased expression in *Fbxl19<sup>ACXXC</sup>* ES cells  
1108 following RA treatment.

1109 (E) A boxplot indicating the expression level (FPKM) based on 4sU RNA-seq in wild type ES  
1110 cells of the gene groupings in (C): n.c. genes  $n=17869$  (no change), up genes = 889, down  
1111 genes = 552. p-values calculated using a Wilcoxon rank sum test are indicated.

1112 (F) A boxplot indicating the  $\log_2$  fold change in gene expression of the gene groupings in (E)  
1113 upon RA differentiation of ES cells. p-values calculated using a Wilcoxon rank sum test are  
1114 indicated.

1115 (G) A boxplot indicating the change in CDK8 binding ( $\log_2FC$ ) at the promoters of the gene  
1116 groupings in (E) in ES cells. p-values calculated using a Wilcoxon rank sum test are indicated.

1117

1118



Dimitrova et al., Figure 7.

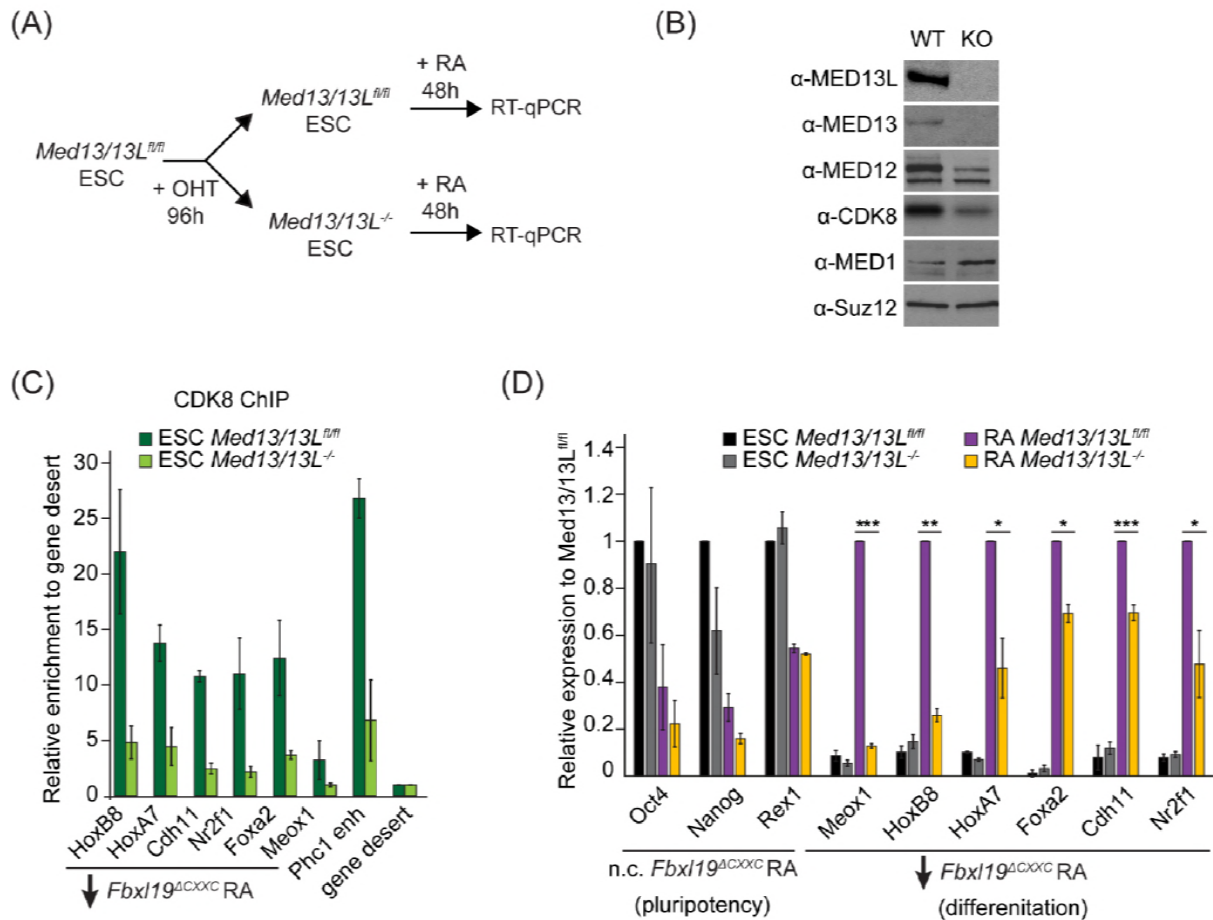

1119

1120 **Figure 7: FBXL19 target genes rely on CDK-Mediator for activation during**  
 1121 **differentiation.**

1122 (A) A schematic illustrating the OHT treatment to generate MED13/13L KO ES cells and  
 1123 differentiation approach.

1124 (B) Western blot analysis showing the efficiency of MED13/13 knock-out upon 96h OHT  
 1125 treatment of *Med13/13L<sup>fl/fl</sup>* ES cells. Suz12 was blotted as a loading control.

1126 (C) ChIP-qPCR showing CDK8 enrichment in WT and MED13/13L KO ES cells. Enrichment  
 1127 is relative to gene desert control region. Error bars show standard deviation of two biological  
 1128 replicates.

1129 (D) RT-qPCR gene expression analysis in WT and MED13/13L KO ES cells before and after  
 1130 RA induction. Expression was normalised to the expression of the PolIII-transcribed gene

1131 *tRNA-Lys* and is represented as relative to WT ES cells (for pluripotency genes) or RA-treated  
 1132 WT cells (for differentiation markers). Error bars show SEM of three biological replicates,

1133 asterisks represent statistical significance calculated by Student T-test: \* p<0.05, \*\* p<0.01,

1134 \*\*\* p<0.001.

(A)

| Stage    | WT       | <i>Fbxl19<sup>CXXCΔ/+</sup></i> | <i>Fbxl19<sup>CXXCΔ/Δ</sup></i> | Total |
|----------|----------|---------------------------------|---------------------------------|-------|
| 9.5 dpc  | 4 (21%)  | 9 (47%)                         | 6 (32%)                         | 19    |
| 10.5 dpc | 20 (26%) | 40 (52%)                        | 17 (22%)                        | 77    |
| newborn  | 8 (33%)  | 16 (67%)                        | 0 (0%)                          | 24    |

(B)

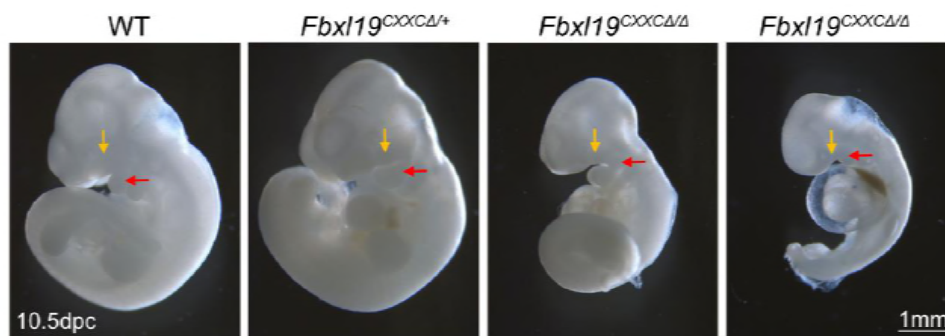

1135

1136 **Figure 8: Deletion of the ZF-CxxC domain of FBXL19 leads to mouse embryonic lethality**

1137 (A) After crossing heterozygotes, the number of live embryos (9.5 dpc or 10.5 dpc) or newborn  
1138 pups with the indicated genotypes is indicated with the percentages shown in parentheses.

1139 (B) The morphological changes in 10.5 dpc *Fbxl19<sup>CXXCΔ/Δ</sup>* embryos are indicated. Lateral views  
1140 of wild-type (wt), together with heterozygous (*Fbxl19<sup>CXXCΔ/+</sup>*) and homozygous (*Fbxl19<sup>CXXCΔ/Δ</sup>*)  
1141 mutants are shown. Maxillary and mandibular components of first branchial arches are  
1142 indicated by yellow and red arrows, respectively.

1143

Dimitrova et al., Supplementary Figure S1.

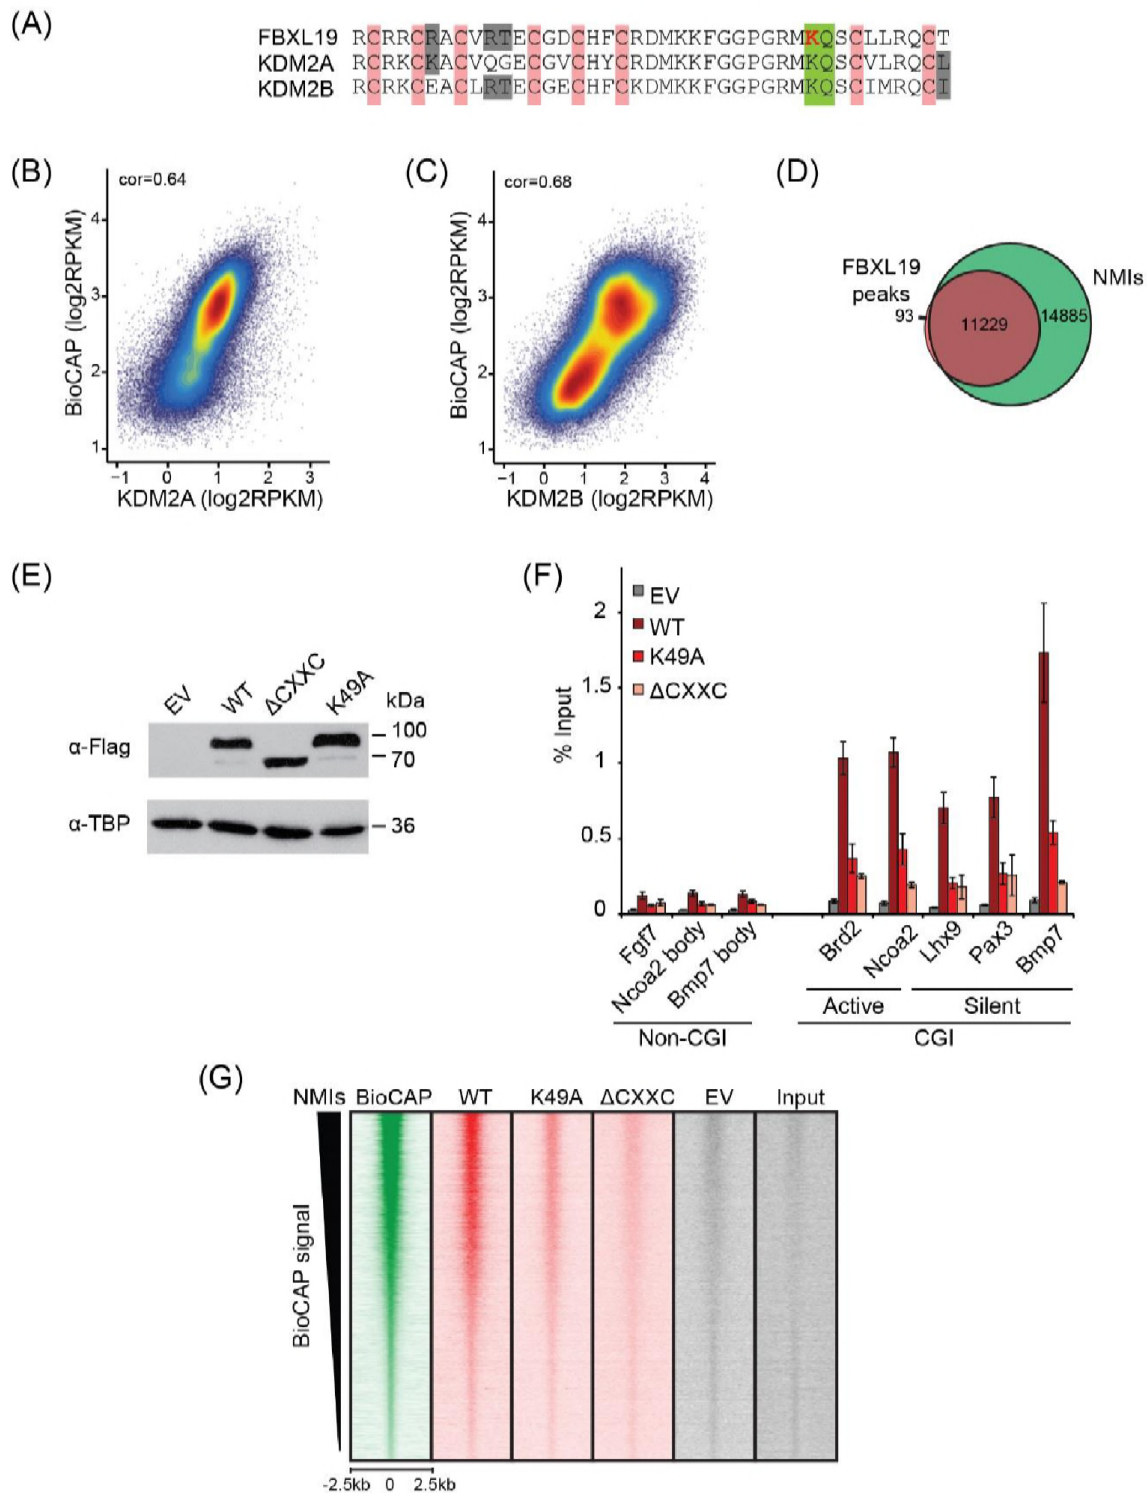

1144

1145 **Figure S1: FBXL19 binds CpG islands genome-wide via its ZF-CxxC domain.**

1146 (A) Alignment of the KDM2 protein ZF-CxxC domains. Pink indicates the location of cysteine  
 1147 residues that coordinate  $Zn^{2+}$  binding in the ZF-CxxC domain. The conserved lysine K49  
 1148 within the CpG-binding KQ motif (green) in FBXL19 is indicated in red.

- 1149 (B-C) A scatterplot showing the Spearman correlation between KDM2A or KDM2B and  
1150 BioCAP at NMIs.
- 1151 (D) A Venn diagram showing the overlap between FS2-FBXL19 peaks (n=11322) and NMIs  
1152 (n=27698).
- 1153 (E) Western blot analysis showing expression of wild-type (WT) FS2-FBXL19,  $\Delta$ CxxC FS2-  
1154 FBXL19 and ZF-CxxC-mutant (K49A) FS2-FBXL19 from nuclear extracts of the respective  
1155 stable ES cell lines.
- 1156 (F) ChIP-qPCR for WT and mutant FS2-FBXL19 enrichment at gene promoters. Error bars  
1157 show SEM of three biological replicates.
- 1158 (G) Heatmap analysis at NMI peaks (n=27698), showing ChIP-seq data for BioCAP, WT FS2-  
1159 FBXL19 and ZF-CxxC mutants over a 5kb region centred on the NMI, sorted by decreasing  
1160 BioCAP signal.
- 1161

Dimitrova et al., Supplementary Figure S2.

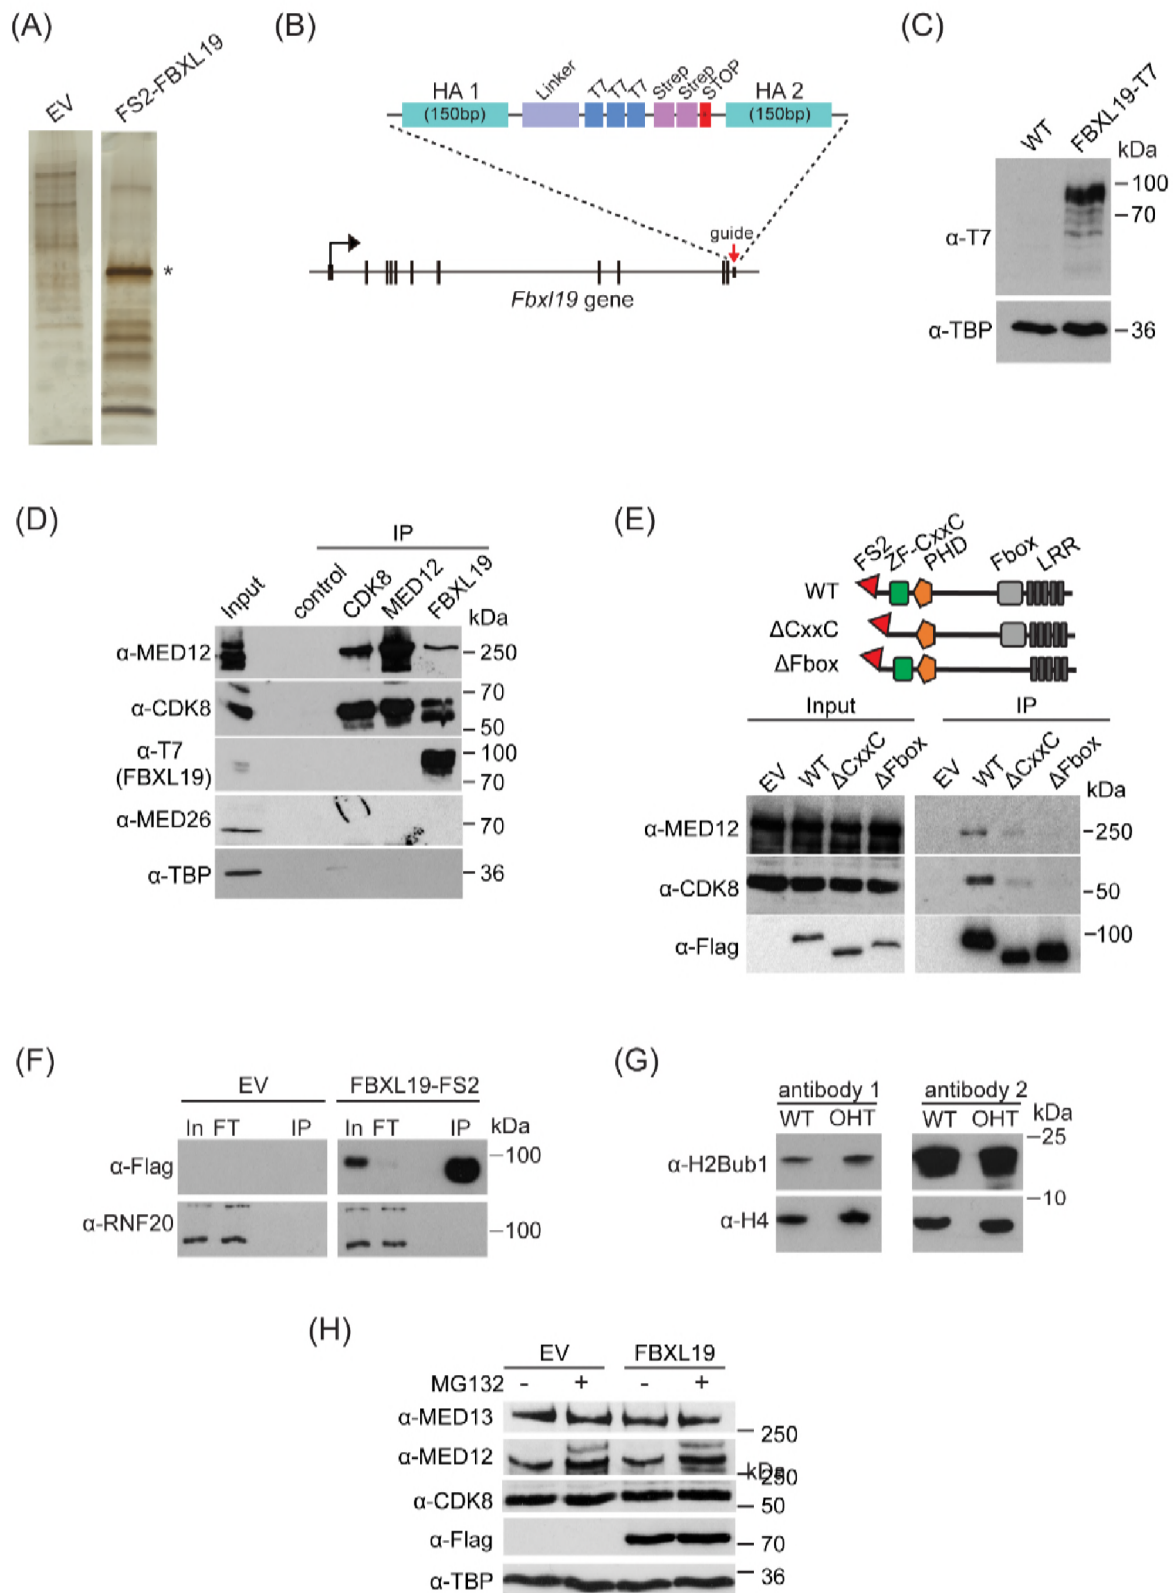

1162

1163 **Figure S2: FBXL19 interacts with CDK-Mediator complex in ES cells.**

1164 (A) A representative silver stained gel for FS2-FBXL19 purification and an empty vector  
1165 control (EV) purification. Asterisk identifies the band corresponding to FS2-FBXL19 protein.  
1166 (B) In order to visualise FBXL19 protein by western blot in Figure S2D and Figure 4B, the  
1167 *Fbxl19* gene was tagged by T7 knock-in in *Fbxl19<sup>fl/fl</sup>* ES cells using the CRISPR Cas9 system.  
1168 A schematic representation of the generation of the C-terminal T7 knock-in *Fbxl19* is shown.  
1169 HA1/2 indicate the homology arms of the targeting construct.  
1170 (C) Western blot analysis of the expression of T7-FBXL19 from nuclear extract of the  
1171 generated T7 knock-in ES cell line.  
1172 (D) Western blot analysis of endogenous co-immunoprecipitation (IP) of FBXL19, CDK8 and  
1173 MED12 from ES cell nuclear extracts. A control IP using a non-specific antibody ( $\alpha$ -HA) was  
1174 included.  
1175 (E) A schematic illustration of the different FS2-FBXL19 truncation mutants and Western blot  
1176 analysis of purification of FS2-FBXL19 mutants from HEK293T cells probed with the  
1177 indicated antibodies.  
1178 (F) Western blot analysis of FS2-FBXL19 and control purifications (EV) probed with the  
1179 indicated antibodies.  
1180 (G) Western blot analysis of histone extracts generated from *Fbxl19<sup>fl/fl</sup>* (WT) and *Fbxl19<sup>ΔCXXC</sup>*  
1181 (OHT) ES cells probed with two different antibodies recognizing ubiquitylated H2B K120  
1182 (H2Bub1). H4 was used as a loading control.  
1183 (H) Western blot analysis of nuclear extracts from HEK293T cells transiently transfected with  
1184 empty vector (EV) or Flag-FBXL19-expressing vector without (-) or following MG132  
1185 treatment (+). Blots were probed with the indicated antibodies. TBP was used as loading  
1186 control.  
1187



Dimitrova et al., Supplementary Figure S3.

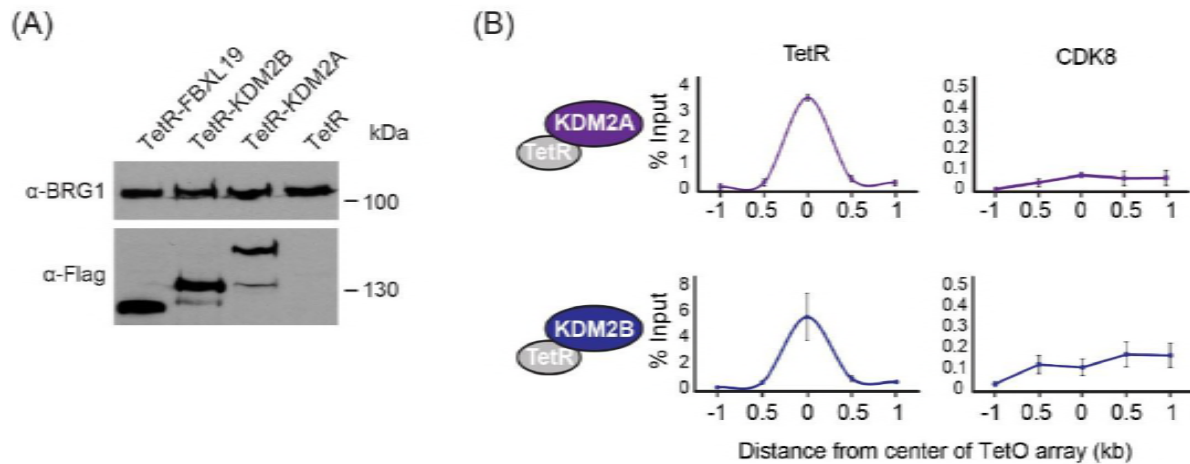

1188

1189 **Figure S3: FBXL19 recruits CDK-Mediator to chromatin.**

1190 (A) Western blot analysis of the expression of the TetR-fusion proteins from nuclear extracts  
1191 of the respective cell lines. BRG1 was probed as a loading control.

1192 (B) ChIP-qPCR analysis of the binding of the indicated proteins across the TetO array (distance  
1193 from center shown) in TetR-KDM2A (top) and TetR-KDM2B (bottom) ES cell lines. The x-  
1194 axis indicates the spatial arrangement of the qPCR amplicons with respect to the center of the  
1195 TetO array (in kb). Error bars represent SEM of three biological replicates.

Dimitrova et al. Supplementary Figure S4.

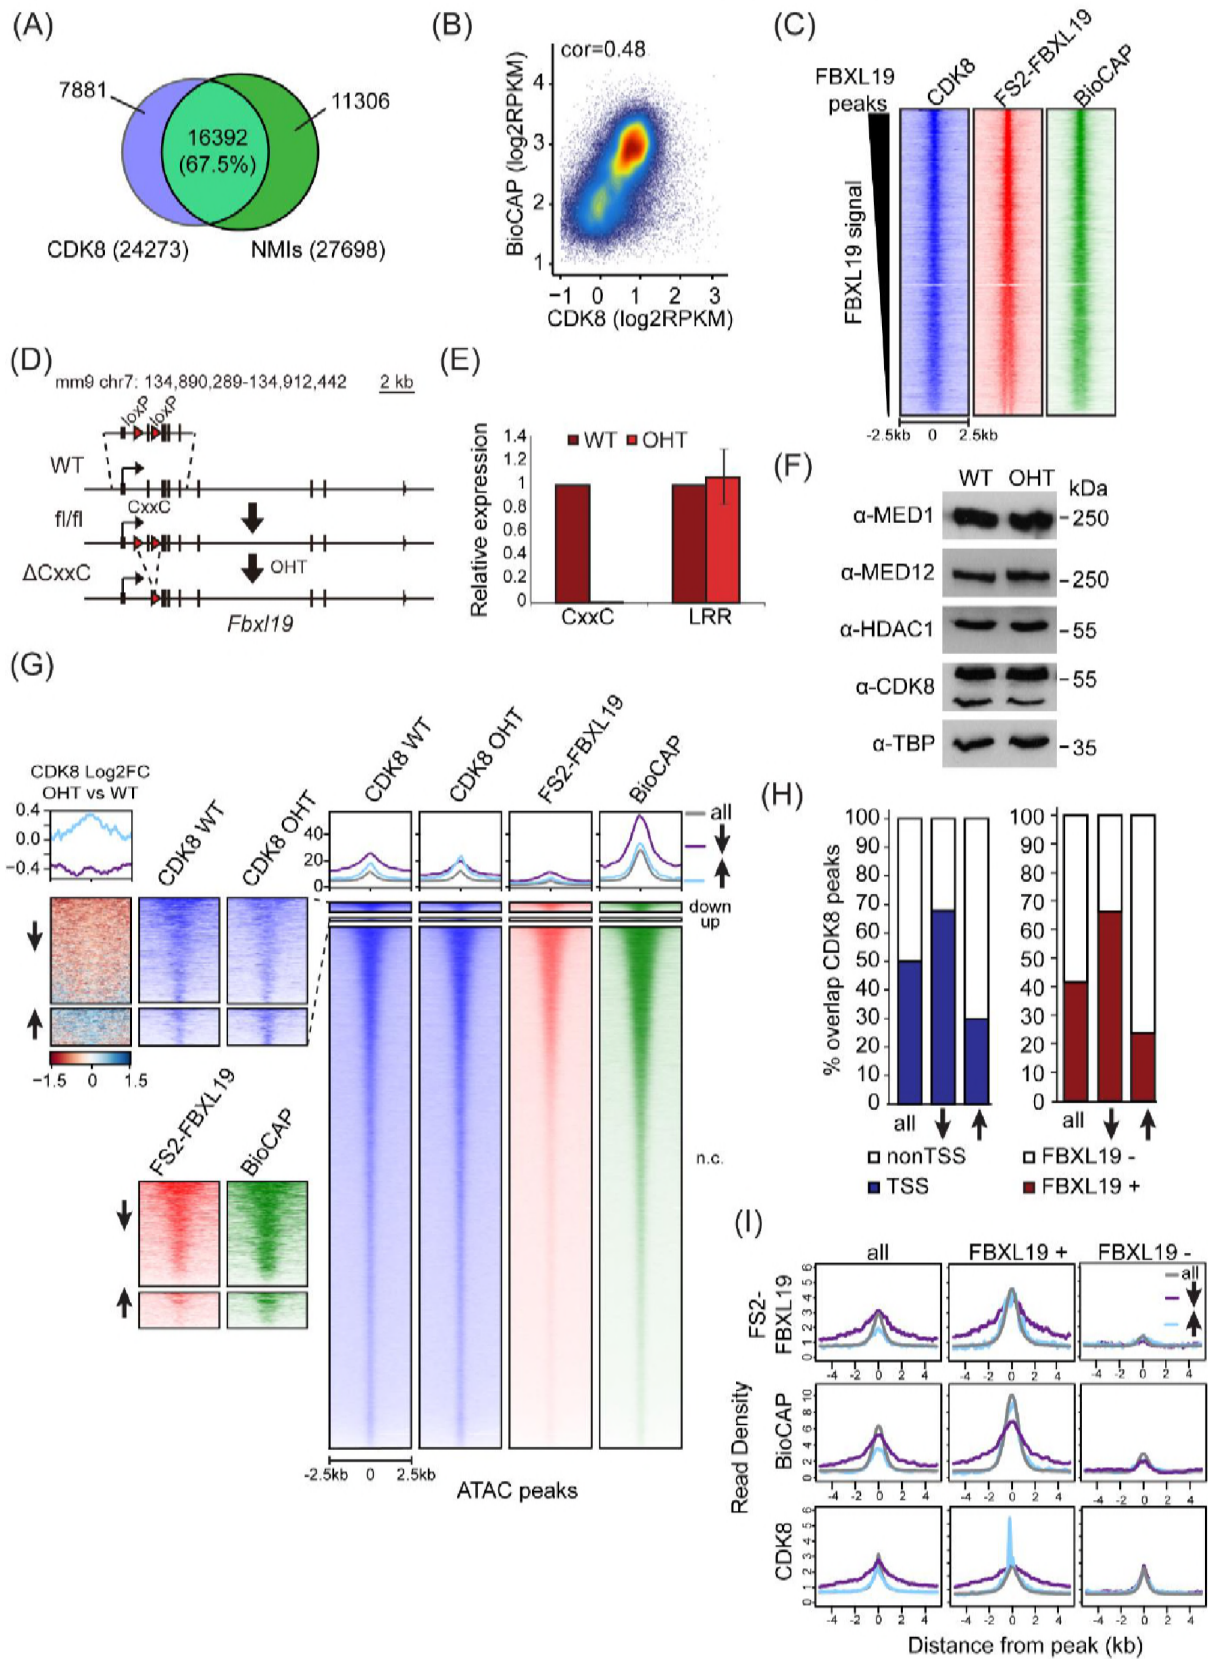



1197 **Figure S4: FBXL19 is required for appropriate CDK8 occupancy at a subset of CpG**  
1198 **island promoters.**

1199 (A) A Venn diagram showing the overlap between CDK8 peaks (n=24273) and NMIs  
1200 (n=27698).

1201 (B) A scatter plot showing Spearman correlation between CDK8 signal and BioCAP at NMIs.

1202 (C) Heatmaps showing enrichment of CDK8, FS2-FBXL19 and BioCAP at FBXL19 peaks  
1203 (n=11322) sorted by decreasing FBXL19 signal.

1204 (D) A schematic of the *Fbxl19*<sup>fl/fl</sup> allele showing the location of the loxP sites. Treatment with  
1205 tamoxifen (OHT) results in Cre-mediated deletion of the second exon, encoding for the ZF-  
1206 CxxC domain but leaving the rest of the gene and protein intact.

1207 (E) RT-qPCR of FBXL19 expression in *Fbxl19*<sup>fl/fl</sup> ES cells before (WT) and following  
1208 tamoxifen treatment (OHT). Primers specific for the ZF-CxxC and LRR domains were used.  
1209 Expression is relative to expression in WT ES cells. Error bars show SEM of three biological  
1210 experiments.

1211 (F) A Western blot analysis of the expression of Mediator subunits in *Fbxl19*<sup>fl/fl</sup> (WT) and  
1212 *Fbxl19*<sup>ACXXC</sup> (OHT) ES cells. HDAC1 and TBP were probed as loading controls.

1213 (G) Heatmaps showing enrichment of CDK8 in *Fbxl19*<sup>fl/fl</sup> (WT) and *Fbxl19*<sup>ACXXC</sup> (OHT), FS2-  
1214 FBXL19 and BioCAP signal at ATAC peaks divided based on change in CDK8 binding in  
1215 *Fbxl19*<sup>ACXXC</sup> ES cells as in Figure 4E. The mean of the enrichment for each group is shown  
1216 above the heatmaps. Left: zoomed heatmaps for ATAC peaks associated with a decrease (↓) or  
1217 an increase (↑) in CDK8 binding and a differential heatmap representing log2 fold change of  
1218 CDK8 signal between OHT and WT samples at the differential peaks.

1219 (H) Percent overlap between CDK8 peaks (as in Figure 4E) and transcription start sites of genes  
1220 (TSS, left) or FBXL19 peaks (right).

1221 (I) Metaplots showing enrichment of FS2-FBXL19, BioCAP and CDK8 ChIPseq signal at all  
1222 CDK8 peaks (left), FBXL19-bound CDK8 peaks (FBXL19+, middle) and nonFBXL19 CDK8  
1223 peaks (FBXL19-, right). Peaks were divided based on change in CDK8 binding in *Fbxl19*<sup>ACXXC</sup>  
1224 ES cells as in Figure 4E.

1225

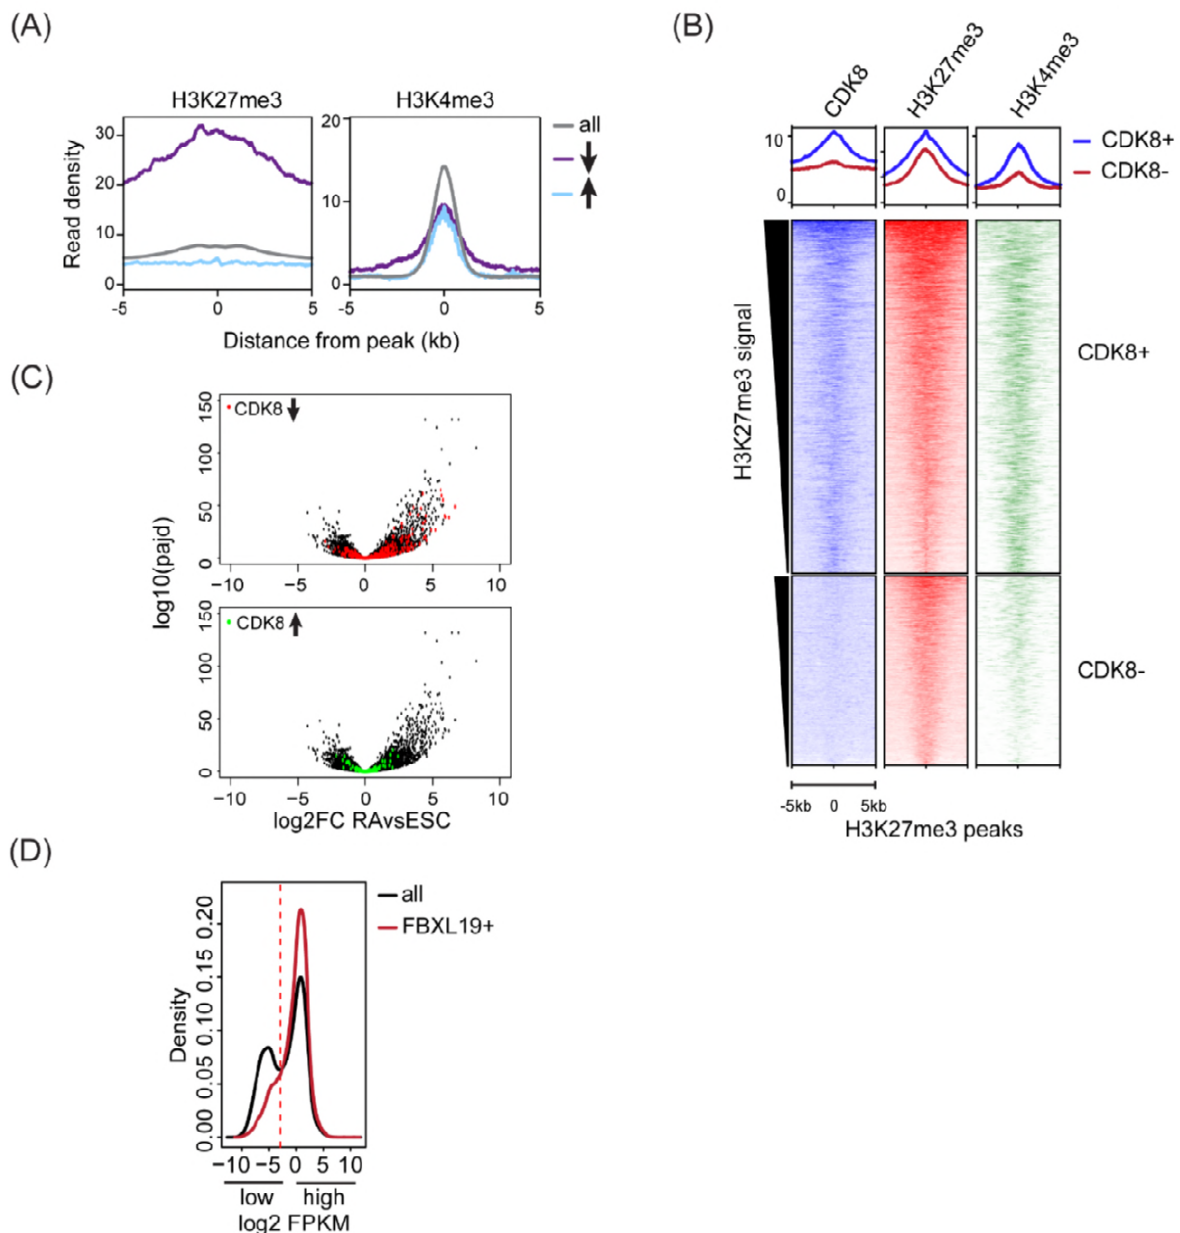

1226

1227 **Figure S5: FBXL19 targets CDK8 to promoters of silent developmental genes in ES cells.**

1228 (A) Metaplots showing enrichment of H3K27me3 (left) and H3K4me3 (right) ChIPseq signal  
1229 at all (top), reduced (↓) and increased (↑) CDK8 peaks.

1230 (B) Heatmaps showing enrichment of CDK8, H3K27me3 and H3K4me3 ChIPseq signal at  
1231 H3K27me3 peaks (n=5588) divided by overlap with CDK8 peaks (CDK8+ n= 3637, CDK8-  
1232 n=1950) sorted by decreasing H3K27me3 signal. Distance from the peak center is shown.

1233 (C) Volcano plots showing alterations in expression (log2 fold change) comparing ES cells and  
1234 RA-treated cells. Genes that rely on FBXL19 for normal CDK8 binding in the ES cells state  
1235 are plotted. Top: reduced levels of CDK8 (red, n=673 of which 203 genes are significantly

1236 induced by RA and 55 genes are ES-specific). Bottom: increased levels of CDK8 (green, n=255  
1237 of which 28 genes are significantly induced by RA and 26 genes are ES-specific).  
1238 (D) Genes for Figures 5 D-F were separated into two categories (low and high expression)  
1239 based on FPKM value cut-off represented by the dashed line.  
1240

Dimitrova et al. Supplementary Figure S6.

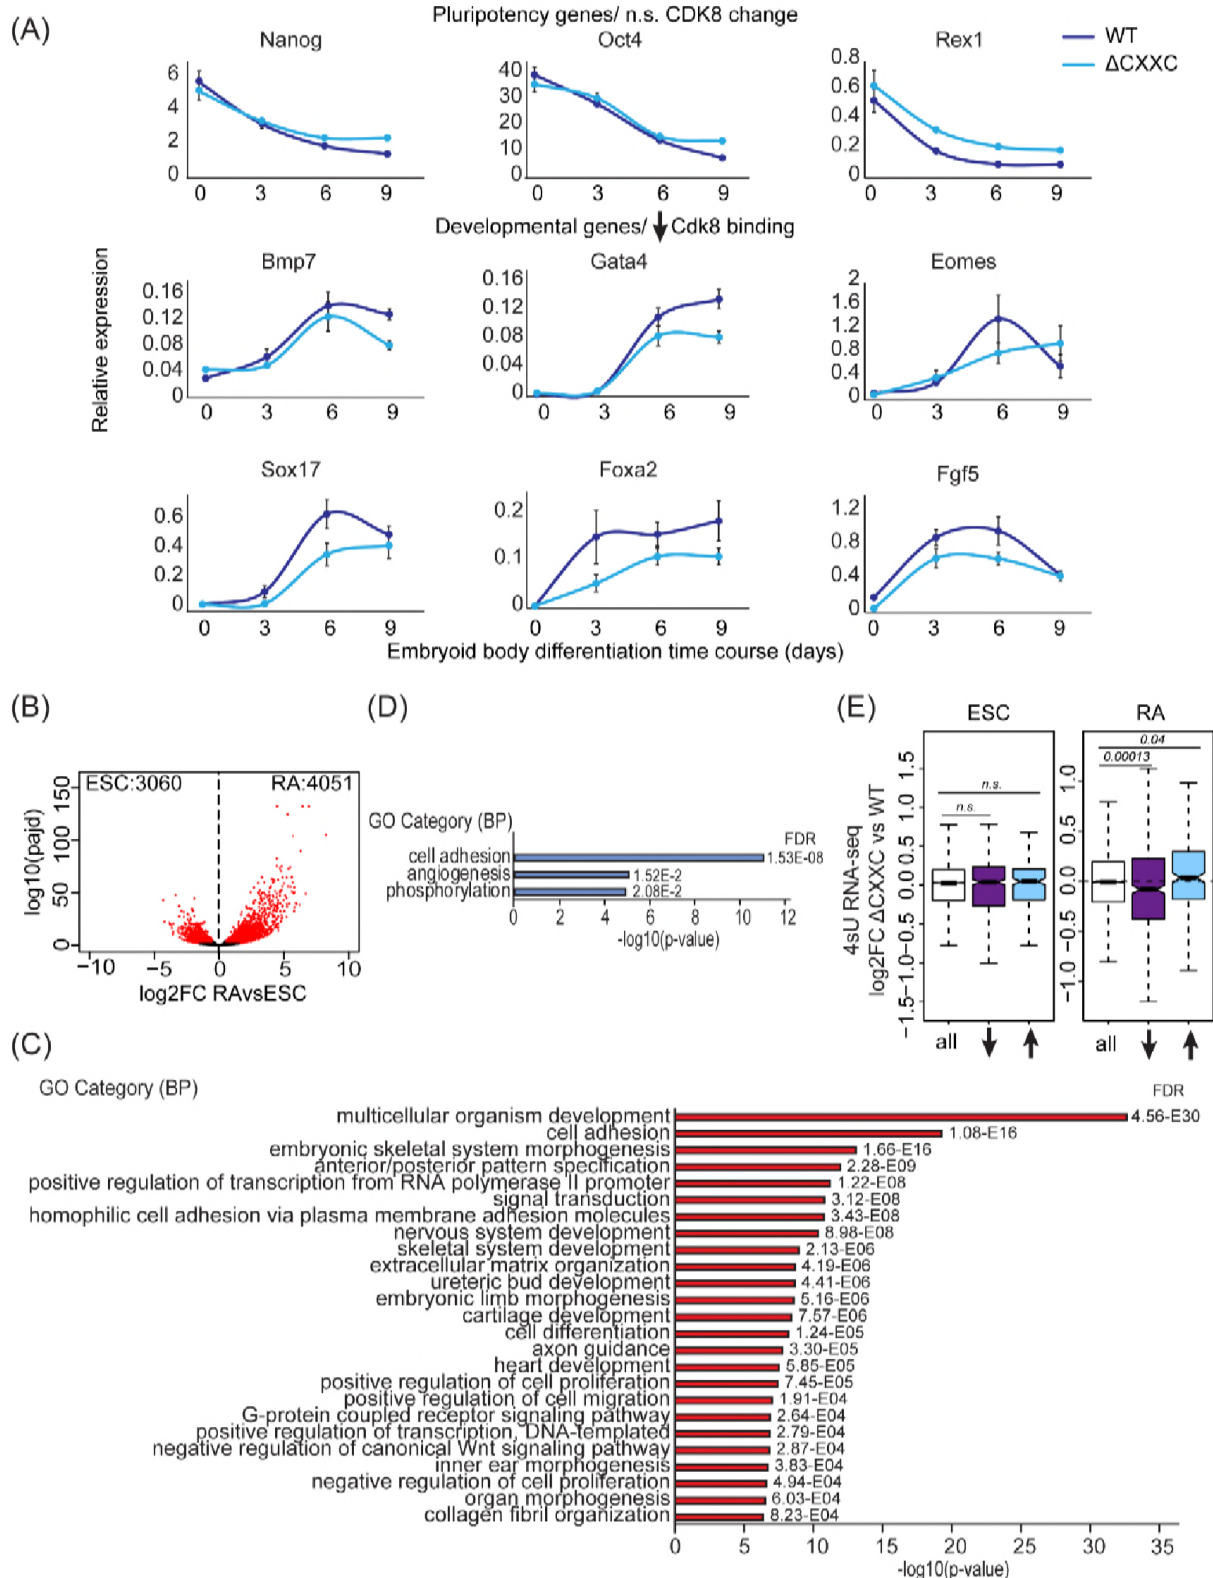

1241

1242 **Figure S6: Removing the CpG island-binding domain of FBXL19 results in a failure to**  
 1243 **induce developmental genes during ES cell differentiation.**

1244 (A) RT-qPCR gene expression analysis of developmental genes during an embryoid body  
1245 differentiation time course. Expression is relative to an average of two house-keeping genes.  
1246 Error bars represent SEM of three biological replicates.

1247 (B) A volcano plot showing differential expression ( $\log_2$  fold change) comparing ES cells and  
1248 RA-induced cells. Differentially expressed genes ( $\log_2FC < -0.5$  or  $\log_2FC > 0.5$ ,  $p_{adj} < 0.05$ )  
1249 are shown in red. The number of genes considered to be significantly different in expression  
1250 are indicated.

1251 (C) Gene ontology analysis of the genes induced following RA treatment.

1252 (D) Gene ontology analysis of the up-regulated genes in *Fbxl19<sup>ACXXC</sup>* cells following RA  
1253 treatment.

1254 (E) Expression changes of CDK8-target genes ( $\log_2$  fold change) in *Fbxl19<sup>ACXXC</sup>* cells  
1255 compared to WT cells in ES cells (ESC, left) and following RA treatment (right). Genes are  
1256 divided based on the changes in CDK8 binding in *Fbxl19<sup>ACXXC</sup>* ES cells - all CDK8 peaks,  
1257 reduced CDK8 peaks ( $\downarrow$ ) and increased CDK8 peaks ( $\uparrow$ ). p-values were calculated using a  
1258 Wilcoxon rank sum test.

1259

1260

Dimitrova et al. Supplementary Figure S7.

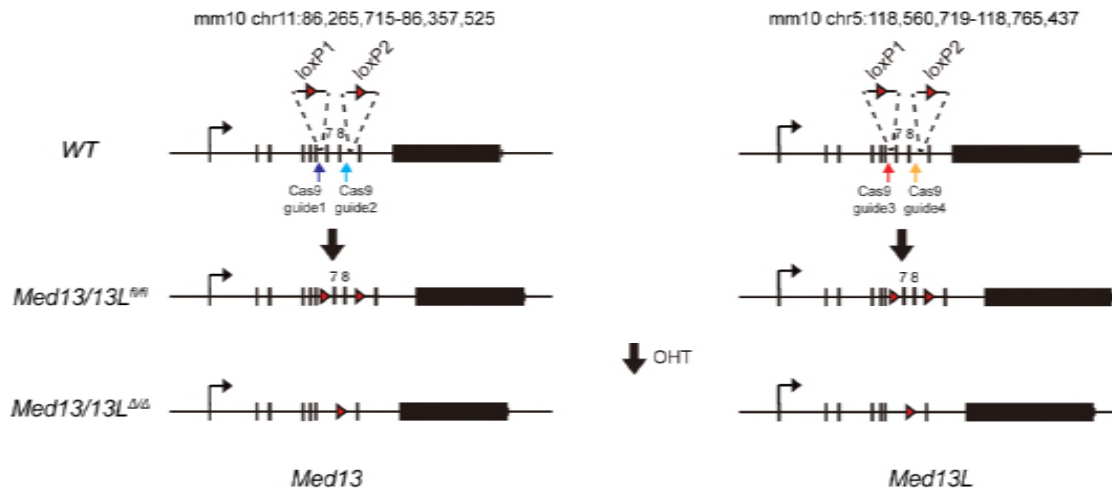

1261

1262 **Figure S7: FBXL19 target genes rely on CDK-Mediator for activation during**  
1263 **differentiation.**

1264 A schematic representation of the strategy used to generate a *MED13/13L* double conditional  
1265 ERT2-Cre ES cell line. LoxP sites flanking exons 7 and 8 of *Med13* and *Med13L* were  
1266 inserted using CRISPR-Cas9 mediated targeting. Treatment with tamoxifen (OHT) results in  
1267 deletion of exons 7 and 8.
